1        **Monitoring oxidative inflammatory processes in live cells and tissue**  
2        **with Hypocrates, a genetically encoded biosensor for hypochlorite**

3        Alexander I. Kostyuk<sup>1,2,12</sup>, Maria-Armineh Tossounian<sup>3,4,5,12</sup>, Anastasiya S. Panova<sup>1,2</sup>,  
4        Marion Thauvin<sup>6,7</sup>, Khadija Wahni<sup>3,4,5</sup>, Inge Van Molle<sup>3,5</sup>, Roman I. Raevskii<sup>1,2,8</sup>, Mikhail  
5        S. Baranov<sup>1,2</sup>, Sophie Vrizz<sup>6,9</sup>, Joris Messens<sup>3,4,5</sup>, ✉, Dmitry S. Bilan<sup>1,2</sup>, ✉, Vsevolod V.  
6        Belousov<sup>1,2,10,11</sup>, ✉.

7  
8        <sup>1</sup> Shemyakin-Ovchinnikov Institute of Bioorganic Chemistry, 117997 Moscow, Russia;  
9        <sup>2</sup> Center for Precision Genome Editing and Genetic Technologies for Biomedicine, Pirogov  
10        Russian National Research Medical University, 117997 Moscow, Russia;  
11        <sup>3</sup> VIB-VUB Center for Structural Biology, B-1050 Brussels, Belgium;  
12        <sup>4</sup> Brussels Center for Redox Biology, B-1050 Brussels, Belgium;  
13        <sup>5</sup> Structural Biology Brussels, Vrije Universiteit Brussel, B-1050 Brussels, Belgium;  
14        <sup>6</sup> Center for Interdisciplinary Research in Biology (CIRB), Collège de France, CNRS,  
15        INSERM, PSL Research University, Paris 75231, France;  
16        <sup>7</sup> Sorbonne Université, Collège Doctoral, Paris 75005, France;  
17        <sup>8</sup> Faculty of Biology, Lomonosov Moscow State University, 119992 Moscow, Russia;  
18        <sup>9</sup> Université de Paris, Paris 75006, France;  
19        <sup>10</sup> Federal Center of Brain Research and Neurotechnologies, Federal Medical Biological  
20        Agency, 117997 Moscow, Russia;  
21        <sup>11</sup> Institute for Cardiovascular Physiology, Georg August University Göttingen, Göttingen  
22        37073, Germany  
23        <sup>12</sup> A.I.K. and M-A.T. contributed equally to this work.  
24        ✉Corresponding Authors:        [d.s.bilan@gmail.com](mailto:d.s.bilan@gmail.com);        [joris.messens@vub.be](mailto:joris.messens@vub.be);  
25        [belousov@fccps.ru](mailto:belousov@fccps.ru)

26  
27        **Abstract**

28        Hypochlorous acid, an aggressive oxidant, is important in immune defense against  
29        pathogens. The current lack of tools to monitor the dynamics of hypochlorous acid in live  
30        cells and tissue hinders a better understanding of inflammatory processes. We engineered

1 a genetically encoded biosensor, Hypocrates, for the visualization of hypochlorous acid.  
2 Hypocrates consists of a circularly permuted yellow fluorescent protein integrated into the  
3 structure of the transcription repressor NemR from *E. coli*. We determined sensitivity,  
4 selectivity, reaction rates, and the X-ray structure of this ratiometric redox biosensor, and  
5 tested the response of Hypocrates in HeLa Kyoto cells at varying hypochlorite  
6 concentrations. By combining Hypocrates with the biosensor HyperRed, we visualized the  
7 dynamics of hypochlorous acid and hydrogen peroxide in a zebrafish tail fin injury model.

8

## 9 **Introduction**

10 In redox biology, much is known about the role of reactive oxygen species (ROS)  
11 in physiological and pathophysiological processes and about their cellular sources of  
12 generation. The best studied ROS is hydrogen peroxide (H<sub>2</sub>O<sub>2</sub>), which is not only cellular  
13 oxidative stress molecule but also a second messenger molecule that regulates cellular  
14 signal transduction pathways by modifying cysteine residues in proteins<sup>1-3</sup>. Another  
15 oxidant, especially known to participate in immune response reactions is hypochlorous acid  
16 (HOCl). However, the role of HOCl remains one of the least explored areas. It is generated  
17 by the heme enzyme myeloperoxidase (MPO), as defense against bacterial infections<sup>4,5</sup>.  
18 MPO catalyzes the conversion of Cl<sup>-</sup> to OCl<sup>-</sup> in the presence of H<sub>2</sub>O<sub>2</sub>. The formed HOCl  
19 can react with nucleophiles containing nitrogen and sulfur atoms, for example, with amines  
20 and thiols, as well as with aromatic rings in organic molecules. The possible cellular targets  
21 for HOCl are numerous: different amino acids in proteins, reduced glutathione, lipids,  
22 carbohydrates, and nucleobases<sup>6-8</sup>.

23 Elevated activity of MPO and as a consequence increased levels of HOCl are often  
24 associated with diseases like atherosclerosis, diseases of the cardiovascular system and  
25 lungs, autoimmune diseases, Alzheimer's disease, and many others<sup>9-12</sup>. Although  
26 important, our knowledge on the spatial and temporal dynamics of HOCl is rather limited.  
27 It is still not known how HOCl participates in cellular signaling. For example, the exact  
28 role of N-chloramine, a milder and longer-lived oxidant compared to HOCl, that results  
29 from the reaction of amines with HOCl, is also not clear<sup>13-15</sup>.

1           The most frequently used approaches to study hypochlorous stress in tissues is by  
2 measuring MPO enzymatic activity using colorimetric methods or immunohistochemical  
3 visualization of the enzyme localization. In addition, mass spectrometry and gas  
4 chromatography allowed the identification of chlorinated compounds as a result of  
5 exposure to HOCl. A drawback of these approaches is that they do not monitor real-time  
6 dynamics within live cells. Therefore, over the past few years, the market has seen a large  
7 number of fluorescent dyes for measuring HOCl<sup>16-22</sup>. Despite all the advantages of these  
8 dyes, genetically encoded biosensors based on fluorescent proteins started revolutionizing  
9 redox biology research<sup>23</sup>. Their main advantage over synthetic dyes is the ability to register  
10 the studied parameter in living systems of any level of complexity and this in real time. In  
11 particular, probes of the HyPer family contributed to our understanding of the biological  
12 role of H<sub>2</sub>O<sub>2</sub><sup>24-28</sup>. Today, there is evidence that the aggressive oxidant HOCl also is  
13 involved in the regulation of proteins, modifying specific amino acid residues<sup>29-33</sup>.  
14 However, the development of an indicator of protein nature for the visualization of HOCl  
15 seemed to be an impossible task.

16           Here we engineered a genetically encoded biosensor, the first of its kind for the  
17 visualization of HOCl in live cells and *in vivo* models. The biosensor is based on circularly  
18 permuted yellow fluorescent protein (cpYFP) integrated into the modified structure of the  
19 *E. coli* transcription repressor NemR. Wild-type NemR is sensitive to reactive chlorine  
20 species, including HOCl and chloramines<sup>32,34</sup>, as well as to some electrophiles<sup>35</sup>. It has  
21 been suggested that the oxidation with reactive chlorine species leads to the formation of a  
22 reversible sulfenamide bond between Cys106 and Lys175, which induces a local minor  
23 change in the protein conformation<sup>32,34</sup>. Therefore, to develop a biosensor specific for  
24 HOCl, we used NemR with only a single cysteine, Cys106 (NemR<sup>C106</sup>). The newly  
25 developed biosensor was named Hypocrates (from **Hypochlorite Ratiometric Sensor**). The  
26 name is consonant with the name of the "Father of Medicine", Hippocrates. This greatest  
27 ancient physician was one of the first to depict signs of inflammation and to reflect on the  
28 nature of this process.

29

## 30           **Results**

## 1           **Hypocrates (NemR-cpYFP biosensor) architecture and design**

2           We decided to start this study by looking for prokaryotic transcription factors which  
3 sense hypochlorite anions ( $\text{ClO}^-$ ). HypR and NemR were selected<sup>32,33</sup>. For our study, a  
4 NemR mutant with all Cys residues substituted for Ser, except for Cys106 (NemR<sup>C106</sup>)<sup>32</sup>,  
5 was used to avoid undesirable sensitivity for reactive electrophilic species (RES) and to  
6 minimize other nonspecific redox reactions. We then measured the second-order rate  
7 constants of NemR<sup>C106</sup> and HypR by monitoring the change of their respective intrinsic  
8 tyrosine and tryptophane fluorescence with increasing NaOCl concentrations  
9 (**Supplementary Fig. 1**). We found that NemR<sup>C106</sup> ( $\sim 1.1 \times 10^5 \text{ M}^{-1}\text{s}^{-1}$ ) reacts 160-times  
10 faster compared to HypR ( $\sim 670 \text{ M}^{-1}\text{s}^{-1}$ ), and exposure to  $\text{H}_2\text{O}_2$  had no effect  
11 (**Supplementary Fig. 2**).

12           Based on these observations, we selected NemR<sup>C106</sup> as the molecular platform to  
13 design a biosensor for  $\text{ClO}^-$  detection. NemR<sup>C106</sup> consists of a DNA-binding and a sensory  
14 domain. The sensory domain has a flexible loop with the critical Cys106 located at the C-  
15 terminus (**Fig. 1A**). Based on the proposed protein functionality and structural flexibility  
16<sup>32</sup> (**Supplementary Fig. 3**), we hypothesized that after introducing cpYFP, the flexible  
17 loop could serve as a molecular switch capable of altering the optical properties of cpYFP  
18 (**Fig. 1B**).

19           We constructed 12 chimers by introducing cpYFP in several positions of the  
20 NemR<sup>C106</sup> flexible loop and by using a variation of short linkers (SAG/G or SAG/GT)  
21 (**Supplementary Fig. 4A**). We suggested that shortening of the cpYFP integration region  
22 can lead to a better signal transmission from the sensory to the reporter unit of the sensor.  
23 Therefore, we designed four chimers with one or two amino acid deletions in the flexible  
24 loop.

25           We recombinantly expressed all chimers in *E. coli*, tested the changes in the  
26 fluorescence excitation spectrum by adding NaOCl to the bacterial suspensions and to the  
27 purified chimers (**Supplementary Fig. 4B**). We selected the version with a maximum  
28 response amplitude of approximately 1.6 for further studies and named it Hypocrates (**Fig.**  
29 **1C**) (**Supplementary Fig. 4C**). Purified Hypocrates protein is characterized by two  
30 excitation maxima ( $\sim 425 \text{ nm}$  and  $\sim 500 \text{ nm}$ ) and one fluorescence emission ( $\sim 518 \text{ nm}$ )

1 maximum (**Fig. 1D**). The estimated Hypocrates brightness is in the ~4400-13900 range,  
2 depending on both the excitation wavelength and the redox state, which is approximately  
3 7%-22% of the EYFP brightness (**Supplementary Tab. 1**). Further, after added NaOCl to  
4 *E. coli* cells expressing Hypocrates, we observed a ratiometric change in the fluorescence  
5 excitation spectrum (**Fig. 1E**). Thus, the biosensor signal can be calculated as a  $E_{X500}/E_{X425}$   
6 ratio. Purified Hypocrates behaved similarly and the ratiometric response can be reversed  
7 in the presence of a reducing agent (**Fig. 2F**). Next, we decided to test whether the  
8 biosensor is also sensitive to the HOCl-derivative N-chlorotaurine (NCT). NCT is one of  
9 the most common derivatives of reactive chlorine species because of the presence of  
10 relatively high taurine concentrations in neutrophils <sup>36</sup>. Also for NCT, Hypocrates resulted  
11 in a fully reversible ratiometric response (**Fig. 1G**).

12 If Hypocrates works according to the above-proposed principles, then substitution  
13 of the key Cys355 residue for a nonreactive Ser should disrupt its sensing mechanism. We  
14 created this mutant version and named it HypocratesCS. As expected, *E. coli* cells  
15 expressing HypocratesCS did not respond anymore to the addition of NaOCl (**Fig. 1H**).

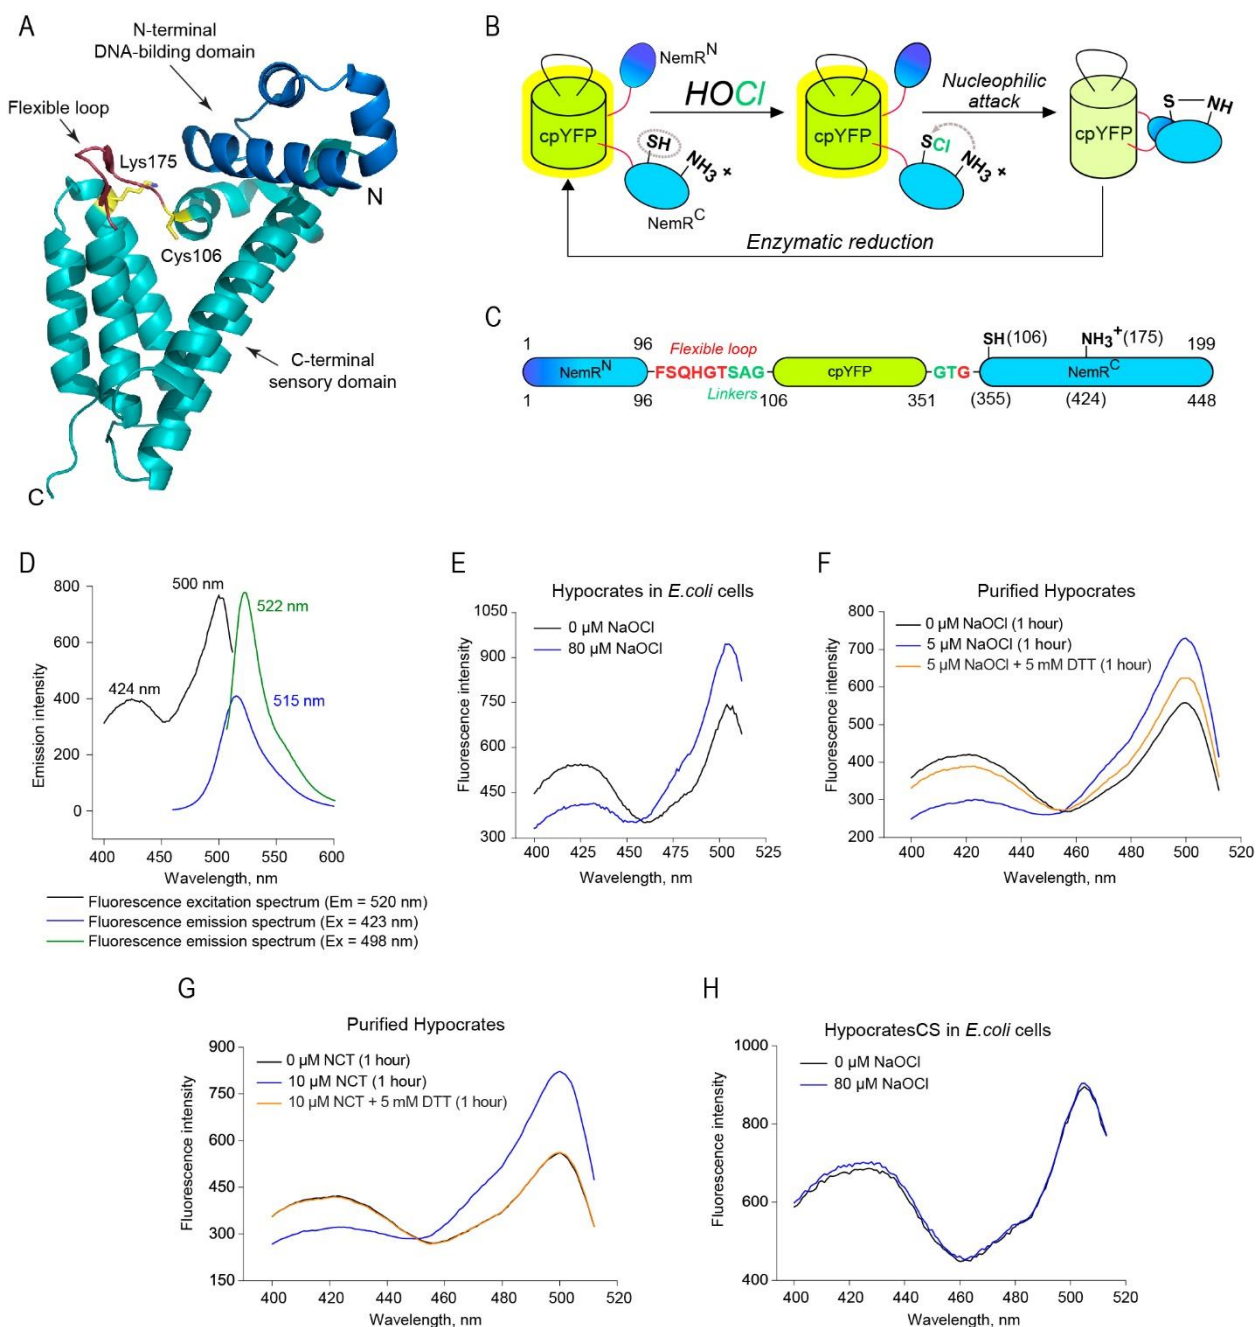

1  
2  
3  
4  
5  
6  
7  
8  
9  
10  
11  
12

**Figure 1. Hypocrates (NemR-cpYFP biosensor) design and spectral characteristics.** (A) The structure of NemR<sup>C106</sup> (PDB ID: 4YZE) shows the N-terminal DNA-binding domain (colored blue), the C-terminal sensory-domain (colored cyan), Cys106 and Lys175 (colored yellow) and the flexible loop (colored red), where the cpYFP was inserted. The N- and C-termini are indicated with N and C, respectively. (B) The proposed simplified scheme of NemR-cpYFP biosensors functioning in living cells. (C) The structure of Hypocrates is presented with NemR<sup>C106</sup> colored blue/cyan, cpYFP colored yellow, the linkers between NemR<sup>C106</sup> and cpYFP colored green and the flexible loop colored red. The upper numbers represent amino acid numbering corresponding to the intact NemR<sup>C106</sup>, while the lower numbers represent numbering corresponding to the biosensor. (D) The optical properties of purified Hypocrates protein in PBS. (E) Hypocrates fluorescence excitation spectra in *E. coli* cells in reduced and NaOCl-oxidized forms. (F) Purified Hypocrates (0.5 μM) fluorescence excitation spectrum behaviors in the presence of NaOCl in saturating

1 concentration. (G) Purified Hypocrates (0.5  $\mu\text{M}$ ) fluorescence excitation spectrum behaviors in the presence  
2 of NCT in saturating concentration. (H) HypocratesCS fluorescence excitation spectra in *E. coli* cells in  
3 reduced and NaOCl-oxidized forms.

4

### 5 **The selectivity of Hypocrates**

6 We showed that Hypocrates is highly sensitive to HOCl and NCT. It is noteworthy  
7 that high concentrations of NaOCl ( $\sim 100 \mu\text{M}$ ), but not NCT, led to pronounced  
8 fluorescence quenching due to apparent protein damage, which further indicates that NCT  
9 reacts with the sensor in a more specific way (**Supplementary Fig. 5**).

10 In addition, we investigated whether global structural changes of Hypocrates  
11 occurred in the presence of NaOCl using circular dichroism (CD). After adding NaOCl to  
12 the biosensor, we observed an increase of the molar ellipticity  $[\theta]$  at 208 nm and 222 nm  
13 and a decrease at 194 nm (**Fig. 2A**). Upon  $\text{H}_2\text{O}_2$  addition, no CD spectral changes were  
14 observed (**Supplementary Fig. 6**). To test whether the optical shift could be restored, we  
15 incubated the NaOCl-oxidized Hypocrates with the reducing agent DTT. After 5 min  
16 incubation with DTT, the spectrum of the oxidized biosensor showed a similar pattern as  
17 the one of reduced form (**Fig. 2B**), indicating the reversibility of the structural changes.

18 As for other cpYFP-based biosensors (except HyPer7<sup>28</sup>), the ratiometric response  
19 of Hypocrates is pH-dependent (**Fig. 2C**). The pKa of purified Hypocrates is 9.10, and  
20 HypocratesCS has a pKa of 9.20. In the presence of NaOCl and NCT, the pKa of  
21 Hypocrates decreases to 8.90 and 8.84, respectively. When changing the pH from 6 to 8,  
22 we observed a 12-fold signal increase; therefore, appropriate pH controls are required.

23 Next, we tested the selectivity of Hypocrates. We incubated the sensor with aliquots  
24 of various common oxidants (**Fig. 2D**). Only minor signal fluctuations were observed in  
25 the presence of high concentrations of  $\text{H}_2\text{O}_2$ , xanthine oxidase/xanthine system ( $\text{O}_2^{\bullet-}$   
26 generator), MAHMA NONOate ( $\text{NO}^{\bullet}$  generator), and GSSG (**Fig. 2D**). Although  
27 Hypocrates also shows a ratiometric response to  $\text{ONOO}^-$  (**Fig. 2D**) (**Supplementary Fig.**  
28 **5**), the probability of such a response in biological systems is low because of the low  
29 sensitivity to  $\text{ONOO}^-$  and its low cellular concentration.

30

31



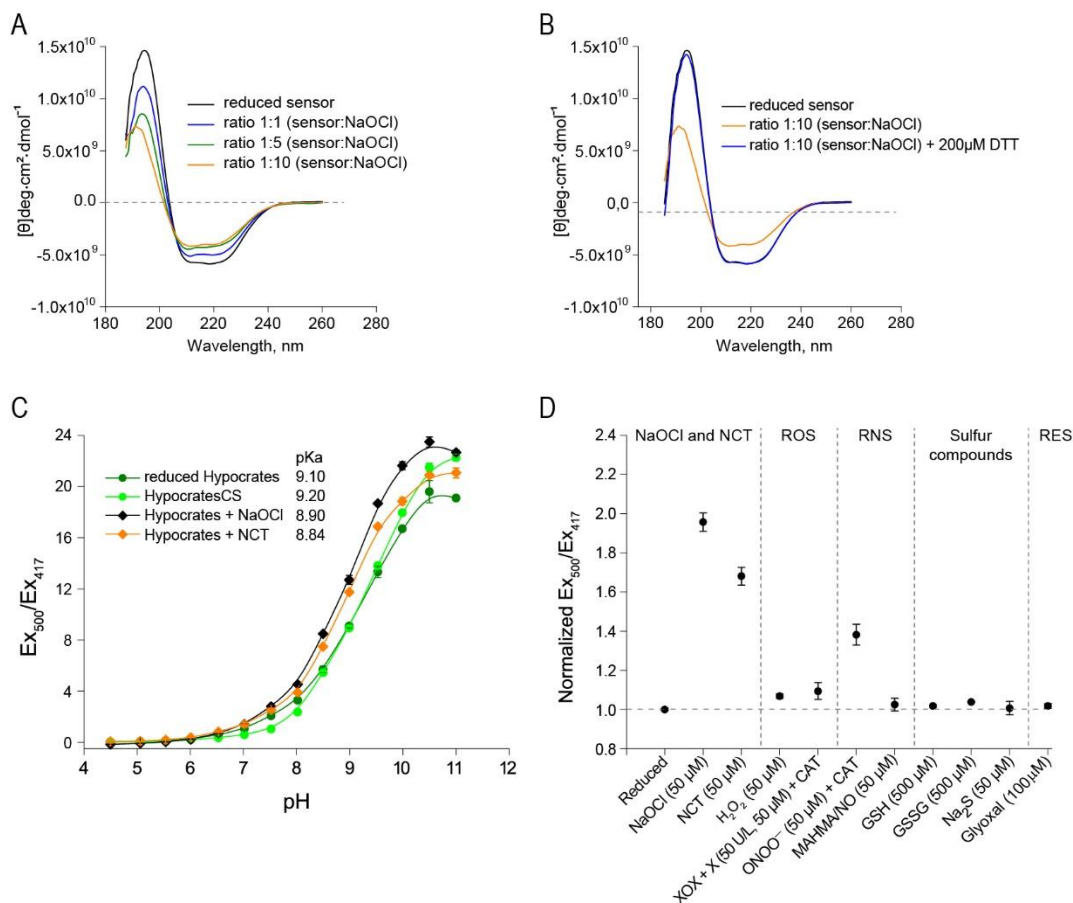

1  
2  
3  
4  
5  
6  
7  
8  
9  
10  
11  
12

**Figure 2. The selectivity of Hypocrates.** (A) Far-UV circular dichroism spectra of reduced and NaOCl oxidized Hypocrates. With increasing NaOCl concentration, an increase of the molar ellipticity  $[\theta]$  at 208 nm and 222 nm and a decrease at 194 nm were observed. (B) Upon reduction with DTT, the NaOCl-treated biosensor restores its overall secondary structure to the reduced form. (C) The excitation ratio of reduced and oxidized Hypocrates depends on the pH value of the buffer solution. The data are presented as a mean  $\pm$  SEM,  $n \geq 3$ . (D) Selectivity profile of purified Hypocrates towards a set of various redox compounds. ROS – reactive oxygen species, RNS – reactive nitrogen species, RES – reactive electrophilic species. Protein concentration was 2  $\mu$ M in sodium/phosphate buffer in all samples except for the sample with glyoxal. In the sample with glyoxal, protein concentration was 0.5  $\mu$ M in PBS. The data are presented as the mean  $\pm$  SEM,  $n \geq 3$ .

13 To validate whether the NaOCl-induced fluorescence changes are NemR<sup>C106</sup>-  
14 derived, we treated purified cpYFP (0.5  $\mu$ M) and two other cpYFP-based biosensors  
15 (HyPer-2<sup>25</sup> and SypHer3s<sup>37</sup>) with NaOCl (5-10  $\mu$ M) (**Supplementary Fig. 7**). cpYFP  
16 itself and also HyPer-2 and SypHer3s showed no response. As such, we concluded that  
17 cpYFP itself does not contribute to the ratiometric response. To obtain more direct  
18 evidence that the generated signal is NemR<sup>C106</sup>-derived, the intrinsic Trp fluorescence  
19 change of NemR<sup>C106</sup> (2  $\mu$ M) was determined in the presence of oxidizing agents (50  $\mu$ M)



1 **(Supplementary Fig. 7D)**. Both NaOCl and NCT caused Trp-fluorescence changes ( $\lambda_{\text{ex}} =$   
2 295 nm,  $\lambda_{\text{em}} = 350$  nm).

3

#### 4 **Hypocrates sensitivity and reaction rates**

5 The sensitivity of Hypocrates towards NaOCl and NCT was studied by titrating the  
6 biosensor (0.5  $\mu\text{M}$ ) with increasing oxidant concentrations up to 10  $\mu\text{M}$  or 15  $\mu\text{M}$  in  
7 sodium/phosphate buffer (**Fig. 3A-D**). In sodium/phosphate buffer, Hypocrates achieves  
8 saturation at  $\sim 4\text{-}5$   $\mu\text{M}$  (8-10:1 oxidant/sensor ratio). The  $\text{Ex}_{500}/\text{Ex}_{417}$  ratio stabilizes at  
9 response values of  $\sim 1.8$ -fold (for NaOCl) and  $\sim 1.7$ -fold (for NCT) under saturating  
10 conditions. To estimate corresponding limits of detection (LOD), we implemented the  
11  $3S_{y|x}/b$  approach, where  $S_{y|x}$  is the residual standard error and  $b$  is the slope of the linear  
12 regression model. In the described system, the LOD values are approximately 290 nM and  
13 330 nM for NCT and NaOCl, respectively.

14 To compare the reaction rates of Hypocrates towards NaOCl and NCT, the second-  
15 order rate constants were measured with the oxidants on a stopped-flow instrument (**Fig.**  
16 **3E,F**). We found that the biosensor reacts faster with NaOCl ( $\sim 3.7 \times 10^5 \text{ M}^{-1}\text{s}^{-1}$ ) compared  
17 to NCT ( $\sim 4.3 \times 10^4 \text{ M}^{-1}\text{s}^{-1}$ ).  $\text{NemR}^{\text{C106}}$  is also less reactive to NCT compared to NaOCl  
18 (**Supplementary Fig. 8**), which possibly corresponds to the fact that NCT is a less  
19 aggressive compound.

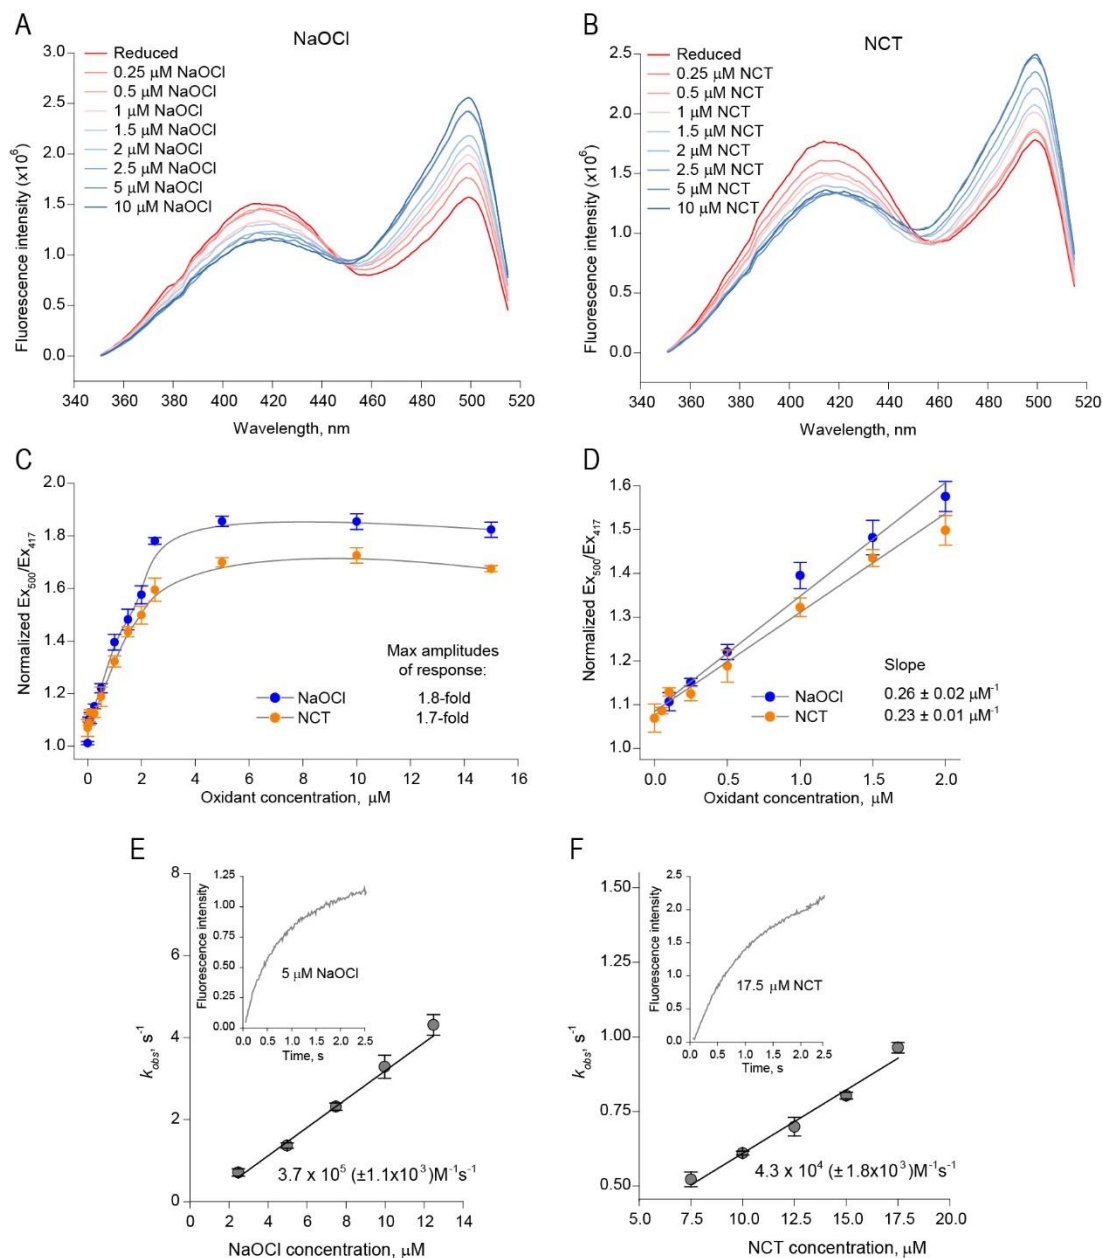

1  
2  
3  
4  
5  
6  
7  
8  
9  
10  
11  
12  
13

**Figure 3. Hypocrates sensitivity and reaction rates.** Changes in the fluorescence excitation spectra of Hypocrates (0.5  $\mu\text{M}$ ) obtained by sequential additions of (A) NaOCl or (B) NCT aliquots. (C) Titration curves of Hypocrates (0.5  $\mu\text{M}$ ) in sodium/phosphate buffer obtained by sequential additions of NaOCl or NCT aliquots. The data are presented as the mean  $\pm$  SEM,  $n \geq 2$ . The maximum amplitudes of response are 1.8- and 1.7-fold for NaOCl and NCT, respectively. In the presence of NaOCl and NCT, the probe is saturated at approximately 5  $\mu\text{M}$ . (D) Hypocrates sensitivity towards NaOCl and NCT is shown. The data are presented as the mean  $\pm$  SEM,  $n \geq 2$ . (E-F) Hypocrates reaction rates. Changes in cpYFP fluorescence at  $>515 \text{ nm}$  cut-off ( $\lambda_{\text{ex}} = 485 \text{ nm}$ ) were measured as a function of time (insert). The curves were fitted to a single exponential to obtain the observed rate constants ( $k_{\text{obs}}$ ), which were plotted as a function of different (E) NaOCl or (F) NCT concentrations. The second-order rate constants of NaOCl ( $3.7 \times 10^5 (\pm 1.1 \times 10^3) \text{ M}^{-1} \text{ s}^{-1}$ ) and NCT ( $3.4 \times 10^4 (\pm 1.8 \times 10^3) \text{ M}^{-1} \text{ s}^{-1}$ ) were determined from the slope of the straight line. For each concentration, at least three independent experiments were performed.

## 1           **X-ray structure of HypocratesCS**

2           To gain insights into the biosensor architecture and functional mechanism, we  
3           decided to crystallize Hypocrates and HypocratesCS. Only HypocratesCS gave diffraction-  
4           quality crystals. The orthorhombic crystals (C222<sub>1</sub>, a=90.242, b= 95.447, c=106.278,  
5            $\alpha=\beta=\gamma= 90^\circ$ ) contain one molecule of the biosensor per asymmetric unit and diffract to a  
6           resolution of 2.1 Å (**Supplementary Tab. 2**). The structure (PDB ID: 6ZUI) was solved  
7           by molecular replacement, using *E. coli* NemR<sup>C106</sup> (PDB ID: 4YZE) and the cpYFP-based  
8           calcium sensor (PDB ID: 3O77) as search models. HypocratesCS consists of a NemR-  
9           based sensor domain (green) and a cpYFP domain (yellow) that undergoes a cyclization  
10          reaction to form the p-hydroxybenzylidene-imidazolidinone chromophore (orange),  
11          designated as “CR2” in the PDB (**Fig. 4A**). Superposition of the NemR<sup>C106</sup> (PDB ID: 4YZE  
12          – blue) and HypocratesCS (sensor domain – green) shows a similar structure with a root  
13          mean square deviation (rmsd) of 0.506 Å for 159 atoms (**Fig. 4B**). As such, the insertion  
14          of cpYFP had only a minor structural effect on the overall structure of the NemR-sensor  
15          domain.

16          The structure of HypocratesCS is the first X-ray structure of a cpFP-based redox  
17          biosensor with an integrated cpYFP domain (**Fig. 4C**). The chromophore is in cis-  
18          configuration (**Supplementary Fig. 9**) and consists of an imidazolinone ring connected to  
19          a planar 4-hydroxybenzyl ring. The 4-hydroxybenzyl ring of the chromophore is stabilized  
20          by  $\pi$ - $\pi$  stacking interaction with the phenyl-ring of Phe164, which has an off-centered  
21          parallel orientation to the 4-hydroxybenzyl ring. Aromatic ring stacking is also observed  
22          in YFP and in the cpYFP-based calcium sensor but is absent in GFP (**Supplementary Fig.**  
23          **10C,D**)<sup>38–40</sup>. The distance between the 4-hydroxybenzyl ring and the Phe164 phenyl ring  
24          is 3.9 Å. Further, the imidazolinone ring of the chromophore has several interactions with  
25          neighboring residues, suggesting that the chromophore will not change position during  
26          excited-state proton transfer (ESPT) (**Fig. 4D**).

27

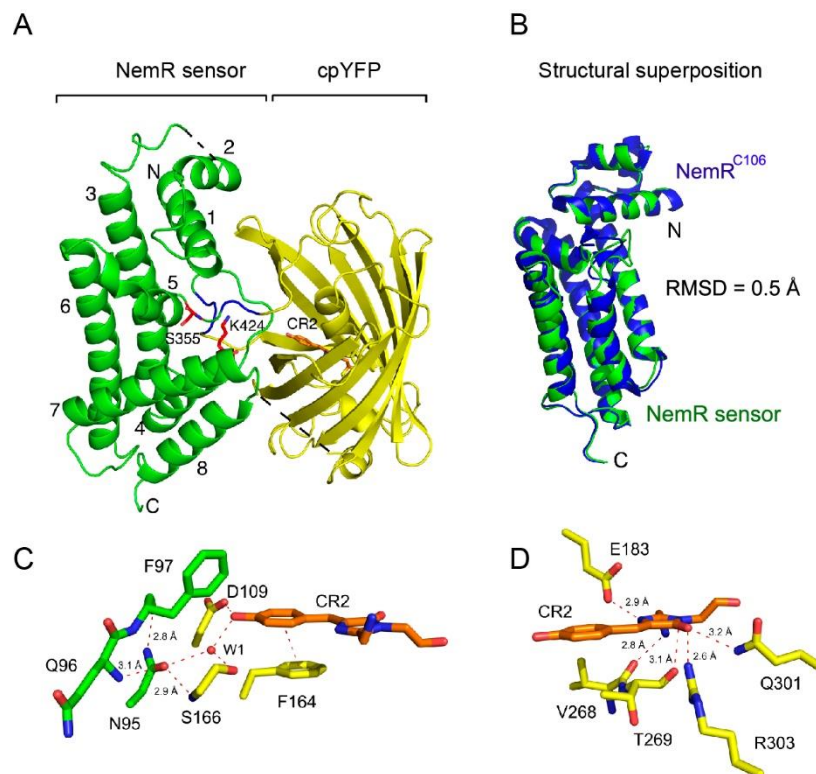

1  
2  
3  
4  
5  
6  
7  
8  
9  
10  
11

**Figure 4. The structure of HypocratesCS, a cpYFP-based biosensor (PDB ID: 6ZUI).** (A) The NemR-sensory domain (green) and the cpYFP domain (yellow) are shown. The chromophore (CR2) in the cpYFP  $\beta$ -barrel is shown in stick representation and colored orange. S355 and K424 are shown in stick representation and colored red. The linkers “SAG” and “GT” are colored blue. The missing segments (residues 40-42 and 191-207) are shown as black dotted lines. (B) Superposition of NemR<sup>C106</sup> (blue – PDB ID: 4YZE) with the NemR-sensory domain (green). (C) N95 connects the sensory domain with cpYFP. N95 interacts with the backbone of Q96, F97 of the NemR-sensory domain and with S166 of the cpYFP domain. The 4-hydroxybenzyl group interacts the phenyl-ring of F164 over a distance of 3.9 Å. (D) The imidazolinone ring interacts with R303, Q301, V268, E183, and T269.

12 Asn95 is the connecting residue between the NemR sensor domain and cpYFP  
13 (PDB ID: 6ZUI). Asn95 is located on the connecting loop between the  $\alpha$ 4 helix of the  
14 NemR-sensor domain and the N-terminus of the cpYFP domain. Asn95 interacts with the  
15 backbone of Gln96 and Phe97 in the NemR-sensor domain, and with Ser166, a conserved  
16 serine of the ESPT pathway in fluorescent proteins (**Supplementary Fig. 10A**). In the Ca<sup>2+</sup>  
17 sensor, Case16, the domain connecting residue is Ser24 (**Supplementary Fig. 10C**)<sup>39</sup>.

18 The ESPT pathways are different for cpYFPs, YFP, and GFP (**Supplementary Fig.**  
19 **10A-D**)<sup>38-40</sup> and consists of a hydrogen-bonding network surrounding the chromophore, a  
20 conserved serine and glutamate, and the conserved water molecules W1 and W2. In cpYFP  
21 (PDB ID: 6ZUI), the phenol oxygen of CR2 interacts with W1 and with Asp109, which

1 might stabilize a negative charge on the phenol oxygen, similar to the phenol oxygen in  
2 GFP, where Thr203 takes over the role of Asp109 (**Supplementary Fig. 10A,D**). Changing  
3 the position of Asn95 of the sensor domain could affect the pKa of the phenol oxygen via  
4 changes in the H-bond network in which W1, Ser166, and Asp109 are involved  
5 (**Supplementary Fig. 10A**), and this change could trigger a different charge transfer from  
6 the phenol oxygen via the phenol and imidazolinone rings with Glu183 as the final  
7 acceptor. The most likely final step of the pathway is a deprotonation of the heterocyclic  
8 ring nitrogen and the protonation of Glu183, rendering both groups neutral, but  
9 determining the exact details of the ESPT pathway and the potential role of W2 is beyond  
10 the scope of the present study.

11

### 12 **Hypocrates performance *in vitro* and in eukaryotic cell culture**

13 We tested the ability of Hypocrates to visualize myeloperoxidase (MPO) activity  
14 *in vitro*. Incubation of the purified protein (0.5  $\mu\text{M}$ ) in the presence of the MPO-H<sub>2</sub>O<sub>2</sub>  
15 system leads to a ratiometric response with an amplitude shift of 1.79-fold after 10 min of  
16 incubation, while H<sub>2</sub>O<sub>2</sub> at a physiologically irrelevant high concentration (100  $\mu\text{M}$ ) induces  
17 only a minor oxidation shift of approximately 1.1-fold (**Fig. 5A,B**).

18 To test whether Hypocrates is functional in a eukaryotic system, we expressed the  
19 sensor in HeLa Kyoto cells and visualized the signal using fluorescence microscopy. To  
20 evaluate the sensitivity of the probe, we tested increasing concentrations of NaOCl and  
21 calculated the response as a  $E_{X500}/E_{X425}$  ratio. The minimal concentration that induced  
22 detectable changes of the sensor fluorescence was approximately 10  $\mu\text{M}$  NaOCl (**Fig. 5C**).  
23 Exposure to 40  $\mu\text{M}$  NaOCl led to a signal change of 1.8-fold, which is similar to the  
24 saturating response obtained with purified protein and in *E. coli* suspension (**Fig. 1E,F**).  
25 The oxidation of the biosensor in HeLa Kyoto cells was reversible – Hypocrates returned  
26 to the initial signal within approximately 3 min after NaOCl addition (**Fig. 5D**). We also  
27 transfected cells with HypocratesCS and with the specific pH-sensor SypHer3s<sup>37</sup>.  
28 Exposure to 40  $\mu\text{M}$  NaOCl did not significantly affect the signal of both probes (**Fig. 5E**),  
29 indicating that the response of Hypocrates, observed in this system, specifically reflects an  
30 NaOCl-induced response.

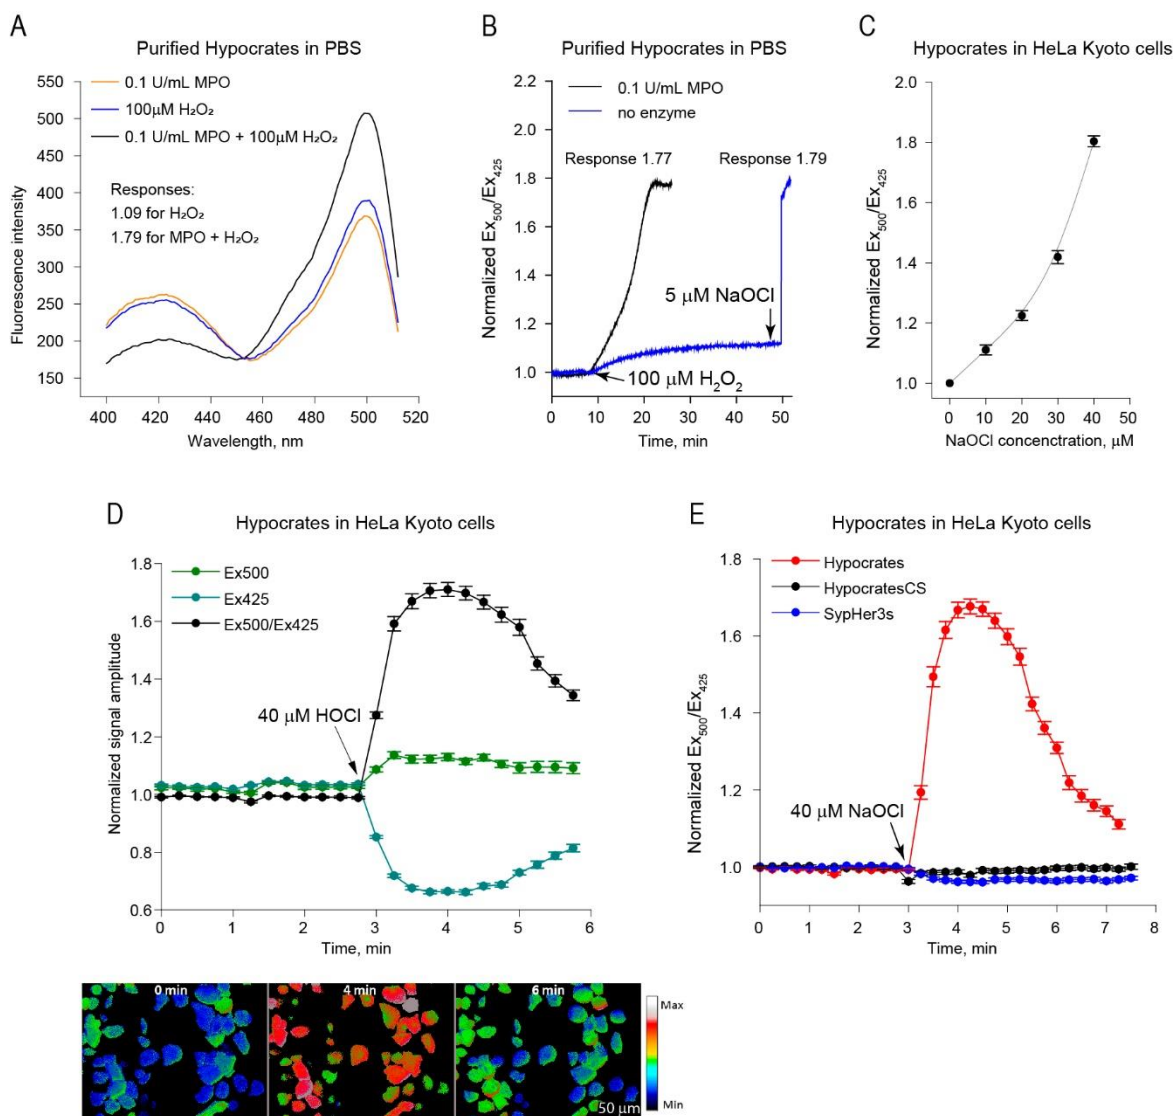

1

2 **Figure 5. Hypocrates performance *in vitro* and in eukaryotic cell culture.** (A) Fluorescence excitation  
 3 spectra of purified Hypocrates (0.5  $\mu$ M) in the presence of individual MPO, H<sub>2</sub>O<sub>2</sub> and MPO-H<sub>2</sub>O<sub>2</sub> system.  
 4 (B) Hypocrates (0.5  $\mu$ M) signal as a function of time in the presence of individual H<sub>2</sub>O<sub>2</sub> and MPO-H<sub>2</sub>O<sub>2</sub>  
 5 system. HOCl, generated by MPO, leads to the development of a saturating response, while a physiologically  
 6 irrelevant H<sub>2</sub>O<sub>2</sub> concentration induces only minor signal changes. (C) The titration curve of Hypocrates in  
 7 HeLa Kyoto cells exposed to different concentrations of NaOCl (values  $\pm$  SEM, N = 2 experiments, n  $\geq$  25  
 8 cells per experiment). (D) Upper part: The timing of Hypocrates fluorescence changes induced by 40  $\mu$ M  
 9 NaOCl (values  $\pm$  SEM, N = 2 experiments, n  $\geq$  30 cells per experiment). Lower part: Images of Hypocrates  
 10 in transiently transfected HeLa Kyoto cells exposed to 40  $\mu$ M of NaOCl at different time points. Scale bar =  
 11 50  $\mu$ m. The lookup table indicates changes in the Ex<sub>500</sub>/Ex<sub>425</sub> ratio. (E) The timing of Hypocrates,  
 12 HypocratesCS and SypHer3s Ex<sub>500</sub>/Ex<sub>425</sub> ratio changes after addition of 40  $\mu$ M NaOCl (values  $\pm$  SEM, N =  
 13 3 experiments, n  $\geq$  28 cells per experiment).

14

15

16



## 1 Hypocrates performance in a zebrafish tail fin injury model

2 To test Hypocrates *in vivo*, we decided to induce inflammation using tail fin  
3 amputation of zebrafish larvae as a model. With the genetically encoded sensor HyPer<sup>24</sup>,  
4 it was previously shown that the H<sub>2</sub>O<sub>2</sub> concentration significantly increases in the wound  
5 margin and reaches its maximal value approximately 20 min post amputation<sup>41</sup>. To obtain  
6 a full picture of the inflammation, we now decided to simultaneously monitor the H<sub>2</sub>O<sub>2</sub> and  
7 OCl<sup>-</sup> production. Therefore, we combined Hypocrates with HyPerRed<sup>27</sup>, a red sensor for  
8 H<sub>2</sub>O<sub>2</sub> (**Fig. 6**). Signals of both Hypocrates and HyPerRed increased 15 min post amputation  
9 (mpa), then HyPerRed fluorescence decreased while Hypocrates signal changed much  
10 more slowly. In parallel, we used the control version HypocratesCS. Although  
11 HypocratesCS signal also increased, statistical analysis revealed that the difference  
12 between the response of Hypocrates and HypocratesCS was significant. We demonstrated  
13 that Hypocrates is suitable for *in vivo* imaging with HypocratesCS as a control.

14

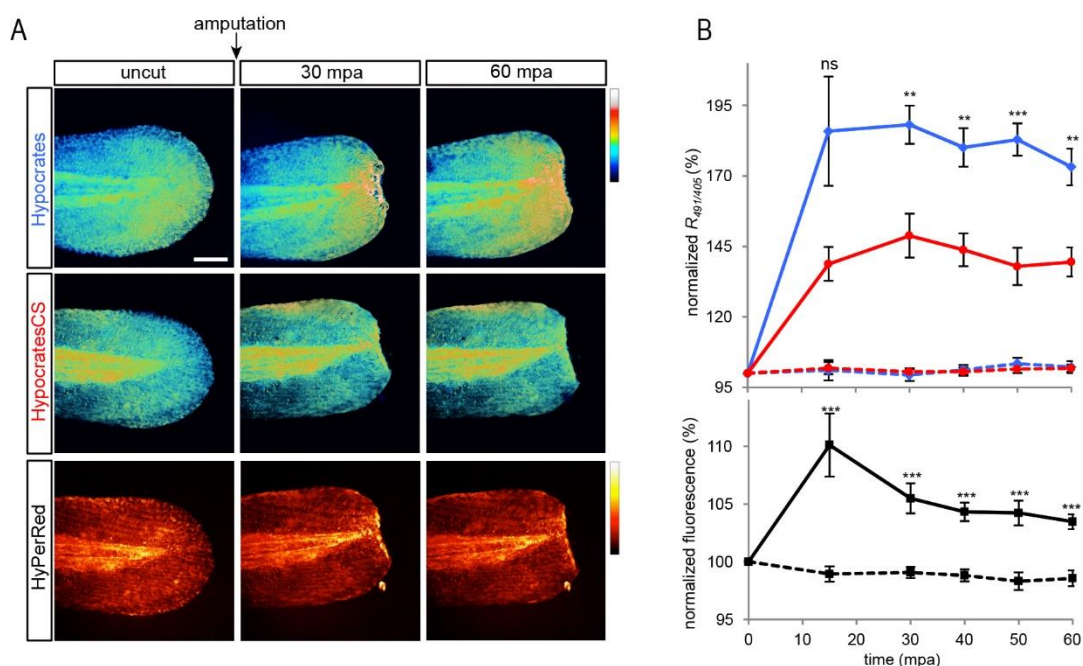

15

16 **Figure 6. Hypochlorite and H<sub>2</sub>O<sub>2</sub> dynamics during zebrafish larvae wounding.** (A) Hypocrates and  
17 HyPerRed imaging. Zebrafish embryos were co-injected with Hypocrates or HypocratesCS and HyPerRed  
18 mRNAs at the 1-cell stage, and a tail fin amputation assay was performed on 48 hpf larvae. Images were  
19 taken before amputation, and time lapse imaging was performed up to 60 min post amputation (mpa). Scale  
20 bar = 100  $\mu$ m. (B) Hypocrates ratio and HyPerRed fluorescence were quantified at the amputation plane and  
21 normalized to the mean fluorescence on uncut tail for each larva. Ratio quantification on larvae tail fin  
22 expressing Hypocrates (blue lines) or HypocratesCS (red lines). Non-amputated embryos (dashed lines)

15

1 expressing Hypocrates or HypocratesCS were also imaged as a control (values  $\pm$  SEM; N = 4 experiments,  
2  $n \geq 3$  embryos/timepoint; ns, no significant, \*\*,  $P < 0.01$ , \*\*\*,  $P < 0.001$ , *versus* HypocratesCS cut larvae).  
3 HyPerRed fluorescence quantification on larvae tail fin expressing HyPerRed (black lines) (values  $\pm$  SEM,  
4 N = 3 experiments,  $n \geq 7$  embryos/timepoint; \*\*\*,  $P < 0.001$ , *versus* uncut larvae (dashed line)).  
5

## 6 **Discussion**

7 HOCl imaging can be addressed with a quite extensive set of low molecular weight  
8 dyes with marked variability in optical properties and chemical structure of the sensing  
9 moiety<sup>16–22,42,43</sup>. Although these dyes often provide sufficient selectivity and were  
10 successfully implemented in cell cultures as well as in whole organisms, they are  
11 characterized by a large number of technical disadvantages. The quantitative interpretation  
12 of the data obtained with these dyes is significantly hampered since the vast majority of  
13 these chemicals generate an intensimetric response. Long term visualization of repetitive  
14 redox events also seems to be problematic due to the irreversible nature of HOCl-induced  
15 modifications that underlie the sensing mechanisms of most of these dyes. Further, the  
16 reaction rates of the current HOCl dyes are relatively low and signal stabilization usually  
17 requires dozens of seconds or even minutes<sup>44</sup>; in particular, the measured rate constants  
18 for CMOS and FDOCl-1 are  $\sim 0.67 \text{ s}^{-1}$  and  $\sim 0.10 \text{ s}^{-1}$ , respectively<sup>45,46</sup>. As a consequence,  
19 rapid shifts in HOCl concentrations will not be visualized, and most likely will lower the  
20 actual sensitivity because of the presence of kinetically more favorable HOCl targets of the  
21 cell. Finally, compared to genetically encoded tools, fluorescent dyes are characterized  
22 with a low spatial resolution. Based on the drawbacks of current tools and on the fact that  
23 more and more proteins are characterized as being modified under hypochlorous stress  
24 conditions, the idea of creating a genetically encoded biosensor for visualizing  
25 hypochlorous acid and its derivatives was born.

26 We present the Hypocrates probe, which is the first genetically encoded fluorescent  
27 biosensor for visualizing HOCl in live systems. Hypocrates displays a ratiometric  
28 reversible change in signal when interacting with HOCl and NCT with minimal response-  
29 inducing oxidant concentrations in the 0.1–0.3  $\mu\text{M}$  range (at the biosensor concentration of  
30 0.5  $\mu\text{M}$ ). It is known that neutrophils produce high amounts of HOCl. It is difficult to  
31 calculate the exact concentration of HOCl produced by cells since it quickly reacts with  
32 surrounding molecules. However, the concentration of HOCl in the interstitial fluids of

1 inflamed tissues has been estimated to reach several millimolar<sup>47</sup>. Hypocrates also allows  
2 monitoring the dynamics of HOCl derivatives. Chloramines are characterized by longer  
3 lifetimes due to decreased reaction rates and altered selectivity profiles with higher  
4 specificity for sulfur-containing groups. Due to the high concentrations of taurine in  
5 neutrophils, N-chlorotaurine is one of the most common derivatives of reactive chlorine  
6 species<sup>36</sup>.

7 Recombinantly expressed and purified Hypocrates did not show any response to  
8 the major common intracellular oxidizing agents. However, we observed spectral changes  
9 of Hypocrates in the presence of ONOO<sup>-</sup>. The saturating concentration of ONOO<sup>-</sup> for the  
10 maximum response of Hypocrates *in vitro* was 10 μM at a biosensor concentration of 0.5  
11 μM. However, ONOO<sup>-</sup> formation in cells directly depends on NO<sup>•</sup>, the concentration of  
12 which during physiological processes *in vivo* can range from 100 pM (or below) up to ~5  
13 nM<sup>48</sup>. Although, in some cases it has been shown that NO<sup>•</sup> reaches micromolar levels in  
14 tissues during specific pathological processes<sup>49</sup>. The rate constant for the reaction of O<sub>2</sub><sup>•-</sup>  
15 with NO<sup>•</sup> to yield ONOO<sup>-</sup> is one order of magnitude higher than O<sub>2</sub><sup>•-</sup> dismutation catalyzed  
16 by superoxide dismutases<sup>50</sup>. Obviously, maximal generation of ONOO<sup>-</sup> and its steady-  
17 state concentration should be achieved at sites with maximal production of O<sub>2</sub><sup>•-</sup> with NO<sup>•</sup>.  
18 However, equimolar fluxes of precursors, suggesting maximal formation of ONOO<sup>-</sup>, is a  
19 simplification of real events in biological systems. For this reason, the actual achievable  
20 concentrations of ONOO<sup>-</sup> are difficult to calculate<sup>51</sup>. In addition, in conditions of  
21 inflammation, many factors are in play, their relationship remains to be studied. For  
22 example, MPO in neutrophils may inhibit NO<sup>•</sup> production via the formation of chlorinated  
23 L-arginine, which inhibits all types of NO<sup>•</sup> synthases<sup>52</sup>. However, for more accurate  
24 measurements various inhibitors of NO<sup>•</sup> synthases can be used in control series of  
25 experiments using Hypocrates as biosensor.

26 The crystal structure of HypocratesCS is the first cpFP-based redox biosensor that  
27 reveals its CR2 chromophore environment within its overall structure (**Fig. 4A,C**). Overall  
28 structure comparison of the β-barrel of cpYFP in Hypocrates (PDB ID: 6ZUI) with the  
29 calcium biosensor, Case16 (PDB ID:3O77)<sup>39</sup>, showed that both β-barrels are very similar  
30 (rmsd of 0.282 Å for 190 atoms). Further, both have a CR2 chromophore, while GFP is

1 characterized by a CRO chromophore (**Supplementary Fig. 10D**). As such, the cpFP in  
2 Case16 is actually a cpYFP, and not a cpGFP as mentioned in Leder *et al.*<sup>39</sup>. The structure  
3 of HypocratesCS is important not only for understanding the functioning of this biosensor  
4 but also for revealing the features of other cpYFP-based probes, which show subtle  
5 differences in their CR2 chromophore environment (**Supplementary Fig. 10A,C**).

6 All in all, Hypocrates is suitable for the study of inflammatory reactions *in vivo*.  
7 Here, we induced inflammation by injuring the caudal fin of *Danio rerio* larvae.  
8 Previously, it was shown with the HyPer biosensor that an H<sub>2</sub>O<sub>2</sub> gradient is formed in the  
9 wound, which serves to attract neutrophils to the area of inflammation<sup>41</sup>. Moreover,  
10 neutrophils subsequently participate in the elimination of the H<sub>2</sub>O<sub>2</sub> gradient due to the  
11 reaction catalyzed by MPO<sup>53</sup>. Here, we observed for the first time in multiparameter  
12 microscopy mode the simultaneous real-time dynamics of H<sub>2</sub>O<sub>2</sub> and HOCl *in vivo* in  
13 zebrafish tissues during inflammation using the red fluorescent biosensor HyPerRed<sup>27</sup> and  
14 the green emitting Hypocrates.

15

## 16 **Data availability**

17 The X-ray crystal structure of HypocratesCS was deposited in the protein data bank under accession  
18 code 6ZUI.

19

## 20 **Acknowledgements**

21 The work was supported by the Russian Foundation for Basic Research (RFBR) Grant 18-34-20032  
22 (to D.S.B.); the Russian Science Foundation (RSF) Grant 17-15-01175 (to D.S.B) for work related to the  
23 preparation and testing of Hypocrates biosensor in the eukaryotic system; the Grants from the Vlaams  
24 Instituut voor Biotechnologie (to J.M.); a FWO Ph.D. fellowship grant (to M-A.T.); CNRS, INSERM,  
25 Collège de France and Université de Paris (MT and SV).

26 We thank Prof. Ursula Jakob for providing the NemR<sup>C106</sup> plasmid; Prof. Haike Antelman for  
27 providing the HypR plasmid; Daria Ezeriņa for several fruitful discussions; the beamline scientists at the  
28 Proxima 2 the beamline of the Soleil synchrotron facility and the beamline scientist Pierre Legrand of the  
29 Proxima 1 beamline at the Soleil Synchrotron facility for his help with data processing.

30

31

32

## 1                    **Author contributions**

2     A.I.K. developed architecture and design of the working version of Hypocrates biosensor, performed the in  
3     vitro experiments, analyzed and combined data, wrote the manuscript;  
4     M-A.T. crystallized, collected data, and solved the structure of HypocratesCS, performed the in vitro circular  
5     dichroism experiments, pKa determination, fluorescence selectivity and sensitivity experiments, pre-steady  
6     state kinetic measurements of Hypocrates and HypR/NemR and wrote the manuscript;  
7     A.S.P. performed experiments in eukaryotic cell culture;  
8     M.T performed experiments in zebrafish;  
9     K.W. helped with the crystal conditions optimization;  
10    I.V.M. helped with X-ray structure refinement, and X-ray data deposition;  
11    R.I.R. helped with the in vitro experiments (selectivity and sensitivity);  
12    M.S.B. synthesized chemical compounds (NCT, ONOO-);  
13    S.V. supervised the in vivo work;  
14    J.M. supervised the in vitro and structural work and wrote the manuscript;  
15    D.S.B. and V.V.B. created the general concept of the project, supervised the work of the project at all stages,  
16    wrote the manuscript.

17

## 18                    **Competing interests**

19    The authors declare no competing interests.

20

## 21                    **References**

- 22    1. Finkel, T. Signal transduction by reactive oxygen species. *J Cell Biol* **194**, 7–15 (2011).
- 23    2. Dröge, W. Free radicals in the physiological control of cell function. *Physiol Rev* **82**,  
24    47–95 (2002).
- 25    3. Sies, H. Hydrogen peroxide as a central redox signaling molecule in physiological  
26    oxidative stress: Oxidative eustress. *Redox Biol* **11**, 613–619 (2017).
- 27    4. Hampton, M. B., Kettle, A. J. & Winterbourn, C. C. Inside the neutrophil phagosome:  
28    oxidants, myeloperoxidase, and bacterial killing. *Blood* **92**, 3007–3017 (1998).
- 29    5. Segal, A. W. How neutrophils kill microbes. *Annu Rev Immunol* **23**, 197–223 (2005).
- 30    6. Pattison, D. I. & Davies, M. J. Absolute rate constants for the reaction of hypochlorous  
31    acid with protein side chains and peptide bonds. *Chem Res Toxicol* **14**, 1453–1464  
32    (2001).

- 1 7. Prütz, W. A. Hypochlorous acid interactions with thiols, nucleotides, DNA, and other  
2 biological substrates. *Arch Biochem Biophys* **332**, 110–120 (1996).
- 3 8. Ford, D. A. Lipid oxidation by hypochlorous acid: chlorinated lipids in atherosclerosis  
4 and myocardial ischemia. *Clin Lipidol* **5**, 835–852 (2010).
- 5 9. Tzikas, S. *et al.* Increased myeloperoxidase plasma levels in patients with Alzheimer’s  
6 disease. *J Alzheimers Dis* **39**, 557–564 (2014).
- 7 10. Stamp, L. K. *et al.* Myeloperoxidase and oxidative stress in rheumatoid arthritis.  
8 *Rheumatology (Oxford)* **51**, 1796–1803 (2012).
- 9 11. Anatoliotakis, N. *et al.* Myeloperoxidase: expressing inflammation and oxidative stress  
10 in cardiovascular disease. *Curr Top Med Chem* **13**, 115–138 (2013).
- 11 12. Zhang, R. *et al.* Association Between Myeloperoxidase Levels and Risk of Coronary  
12 Artery Disease. *JAMA* **286**, 2136–2142 (2001).
- 13 13. Peskin, A. V. & Winterbourn, C. C. Kinetics of the reactions of hypochlorous acid and  
14 amino acid chloramines with thiols, methionine, and ascorbate. *Free Radic Biol Med*  
15 **30**, 572–579 (2001).
- 16 14. Peskin, A. V. & Winterbourn, C. C. Taurine chloramine is more selective than  
17 hypochlorous acid at targeting critical cysteines and inactivating creatine kinase and  
18 glyceraldehyde-3-phosphate dehydrogenase. *Free Radic Biol Med* **40**, 45–53 (2006).
- 19 15. Midwinter, R. G., Cheah, F.-C., Moskovitz, J., Vissers, M. C. & Winterbourn, C. C.  
20 IkappaB is a sensitive target for oxidation by cell-permeable chloramines: inhibition  
21 of NF-kappaB activity by glycine chloramine through methionine oxidation. *Biochem*  
22 *J* **396**, 71–78 (2006).
- 23 16. Fan, J. *et al.* Recognition of HClO in Live Cells with Separate Signals Using a  
24 Ratiometric Fluorescent Sensor with Fast Response. *Ind. Eng. Chem. Res.* **54**, 8842–  
25 8846 (2015).
- 26 17. Wu, L. *et al.* Photostable Ratiometric PdOT Probe for in Vitro and in Vivo Imaging of  
27 Hypochlorous Acid. *J Am Chem Soc* **139**, 6911–6918 (2017).
- 28 18. Xi, L.-L. *et al.* A near-infrared ratiometric fluorescent probe for rapid and selective  
29 detection of hypochlorous acid in aqueous solution and living cells. *Sensors and*  
30 *Actuators B: Chemical* **255**, 666–671 (2018).



- 1 19. Ren, M. *et al.* A lysosome-targeted and ratiometric fluorescent probe for imaging  
2 exogenous and endogenous hypochlorous acid in living cells. *J. Mater. Chem. B* **4**,  
3 4739–4745 (2016).
- 4 20. Xu, C. & Qian, Y. The  $\alpha$ ,  $\beta$ -unsaturated pyrazolone-based fluorescent sensor with red  
5 emission and its application for real-time monitoring hypochlorite in cancer cells and  
6 zebrafish. *Dyes and Pigments* **161**, 303–312 (2019).
- 7 21. Zhang, P. *et al.* Selective visualization of endogenous hypochlorous acid in zebrafish  
8 during lipopolysaccharide-induced acute liver injury using a polymer micelles-based  
9 ratiometric fluorescent probe. *Biosens Bioelectron* **99**, 318–324 (2018).
- 10 22. Chen, X. *et al.* Synthesis of a highly HOCl-selective fluorescent probe and its use for  
11 imaging HOCl in cells and organisms. *Nat Protoc* **11**, 1219–1228 (2016).
- 12 23. Bilan, D. S. & Belousov, V. V. New tools for redox biology: From imaging to  
13 manipulation. *Free Radic Biol Med* **109**, 167–188 (2017).
- 14 24. Belousov, V. V. *et al.* Genetically encoded fluorescent indicator for intracellular  
15 hydrogen peroxide. *Nat Methods* **3**, 281–286 (2006).
- 16 25. Markvicheva, K. N. *et al.* A genetically encoded sensor for H<sub>2</sub>O<sub>2</sub> with expanded  
17 dynamic range. *Bioorg Med Chem* **19**, 1079–1084 (2011).
- 18 26. Bilan, D. S. *et al.* HyPer-3: a genetically encoded H<sub>2</sub>O<sub>2</sub> probe with improved  
19 performance for ratiometric and fluorescence lifetime imaging. *ACS Chem Biol* **8**,  
20 535–542 (2013).
- 21 27. Ermakova, Y. G. *et al.* Red fluorescent genetically encoded indicator for intracellular  
22 hydrogen peroxide. *Nat Commun* **5**, 5222 (2014).
- 23 28. Pak, V. V. *et al.* Ultrasensitive Genetically Encoded Indicator for Hydrogen Peroxide  
24 Identifies Roles for the Oxidant in Cell Migration and Mitochondrial Function. *Cell*  
25 *Metab* **31**, 642-653.e6 (2020).
- 26 29. Verrastro, I., Tveen-Jensen, K., Spickett, C. M. & Pitt, A. R. The effect of HOCl-  
27 induced modifications on phosphatase and tensin homologue (PTEN) structure and  
28 function. *Free Radic Res* **52**, 232–247 (2018).

- 1 30. Perkins, A., Tudorica, D. A., Amieva, M. R., Remington, S. J. & Guillemin, K.  
2 *Helicobacter pylori* senses bleach (HOCl) as a chemoattractant using a cytosolic  
3 chemoreceptor. *PLoS Biol* **17**, e3000395 (2019).
- 4 31. Gebendorfer, K. M. *et al.* Identification of a hypochlorite-specific transcription factor  
5 from *Escherichia coli*. *J Biol Chem* **287**, 6892–6903 (2012).
- 6 32. Gray, M. J., Li, Y., Leichert, L. I.-O., Xu, Z. & Jakob, U. Does the Transcription Factor  
7 NemR Use a Regulatory Sulfenamide Bond to Sense Bleach? *Antioxid Redox Signal*  
8 **23**, 747–754 (2015).
- 9 33. Loi, V. V. *et al.* Redox-Sensing Under Hypochlorite Stress and Infection Conditions  
10 by the Rrf2-Family Repressor HypR in *Staphylococcus aureus*. *Antioxid Redox Signal*  
11 **29**, 615–636 (2018).
- 12 34. Gray, M. J., Wholey, W.-Y., Parker, B. W., Kim, M. & Jakob, U. NemR is a bleach-  
13 sensing transcription factor. *J Biol Chem* **288**, 13789–13798 (2013).
- 14 35. Lee, C., Shin, J. & Park, C. Novel regulatory system nemRA-gloA for electrophile  
15 reduction in *Escherichia coli*. *Mol Microbiol* **88**, 395–412 (2013).
- 16 36. Marcinkiewicz, J. & Kontny, E. Taurine and inflammatory diseases. *Amino Acids* **46**,  
17 7–20 (2014).
- 18 37. Ermakova, Y. G. *et al.* SypHer3s: a genetically encoded fluorescent ratiometric probe  
19 with enhanced brightness and an improved dynamic range. *Chem Commun (Camb)*  
20 **54**, 2898–2901 (2018).
- 21 38. Wachter, R. M., Elsliger, M. A., Kallio, K., Hanson, G. T. & Remington, S. J.  
22 Structural basis of spectral shifts in the yellow-emission variants of green fluorescent  
23 protein. *Structure* **6**, 1267–1277 (1998).
- 24 39. Leder, L. *et al.* The structure of Ca<sup>2+</sup> sensor Case16 reveals the mechanism of reaction  
25 to low Ca<sup>2+</sup> concentrations. *Sensors (Basel)* **10**, 8143–8160 (2010).
- 26 40. Pédelacq, J.-D., Cabantous, S., Tran, T., Terwilliger, T. C. & Waldo, G. S. Engineering  
27 and characterization of a superfolder green fluorescent protein. *Nat Biotechnol* **24**, 79–  
28 88 (2006).

- 1 41. Niethammer, P., Grabher, C., Look, A. T. & Mitchison, T. J. A tissue-scale gradient of  
2 hydrogen peroxide mediates rapid wound detection in zebrafish. *Nature* **459**, 996–999  
3 (2009).
- 4 42. Yue, Y., Huo, F., Yin, C., Escobedo, J. O. & Strongin, R. M. Recent progress in  
5 chromogenic and fluorogenic chemosensors for hypochlorous acid. *Analyst* **141**, 1859–  
6 1873 (2016).
- 7 43. Zhang, Y.-R., Liu, Y., Feng, X. & Zhao, B.-X. Recent progress in the development of  
8 fluorescent probes for the detection of hypochlorous acid. *Sensors and Actuators B:  
9 Chemical* **240**, 18–36 (2017).
- 10 44. Zhu, H. *et al.* Synthesis of an ultrasensitive BODIPY-derived fluorescent probe for  
11 detecting HOCl in live cells. *Nat Protoc* **13**, 2348–2361 (2018).
- 12 45. Liu, Z. *et al.* A novel fluorescent probe for imaging the process of HOCl oxidation and  
13 Cys/Hcy reduction in living cells. *RSC Adv.* **8**, 9519–9523 (2018).
- 14 46. Wei, P. *et al.* Deformylation reaction-based probe for in vivo imaging of HOCl. *Chem.  
15 Sci.* **9**, 495–501 (2018).
- 16 47. Pattison, D. I., Hawkins, C. L. & Davies, M. J. What are the plasma targets of the  
17 oxidant hypochlorous acid? A kinetic modeling approach. *Chem Res Toxicol* **22**, 807–  
18 817 (2009).
- 19 48. Hall, C. N. & Garthwaite, J. What is the real physiological NO concentration in vivo?  
20 *Nitric Oxide* **21**, 92–103 (2009).
- 21 49. Malinski, T., Bailey, F., Zhang, Z. G. & Chopp, M. Nitric oxide measured by a  
22 porphyrinic microsensor in rat brain after transient middle cerebral artery occlusion. *J  
23 Cereb Blood Flow Metab* **13**, 355–358 (1993).
- 24 50. Radi, R. Oxygen radicals, nitric oxide, and peroxynitrite: Redox pathways in molecular  
25 medicine. *Proceedings of the National Academy of Sciences* **115**, 5839–5848 (2018).
- 26 51. Ferrer-Sueta, G. & Radi, R. Chemical Biology of Peroxynitrite: Kinetics, Diffusion,  
27 and Radicals. *ACS Chem. Biol.* **4**, 161–177 (2009).
- 28 52. Yang, J. *et al.* L-arginine chlorination results in the formation of a nonselective nitric-  
29 oxide synthase inhibitor. *J Pharmacol Exp Ther* **318**, 1044–1049 (2006).

1 53. Pase, L., Nowell, C. J. & Lieschke, G. J. In vivo real-time visualization of leukocytes  
2 and intracellular hydrogen peroxide levels during a zebrafish acute inflammation  
3 assay. *Methods Enzymol* **506**, 135–156 (2012).

4  
5

## 6 **Methods**

### 7 **Expression and purification of *S. aureus* HypR**

8 Protein expression and purification were performed as described by Van Loi *et al.*<sup>1</sup>  
9 with minor modifications. Briefly, the harvested cells were lysed using a Sonic VibraCell  
10 sonicator for 10 min, with 30 s sound/30 s pause with 61% amplitude. Cell debris was  
11 removed by centrifugation (45 min at 18,000 rpm, at 4°C; Avanti<sup>®</sup> J-26xp centrifuge  
12 (BECKMAN COULTER<sup>®</sup>)), and the supernatant was in-batch incubated with Ni<sup>2+</sup>-  
13 Sepharose 6 Fast Flow beads (Cytiva) equilibrated with the binding buffer (20 mM  
14 HEPES/NaOH pH 7.5, 0.5 M NaCl and 10 mM imidazole) for 1 h at 4°C. The beads were  
15 then packed in a column coupled to an AKTA<sup>™</sup> Pure system (GE Healthcare, Life  
16 Sciences). HypR was eluted using a linear gradient with elution buffer: 20 mM HEPES pH  
17 7.5, 0.5 M NaCl and 0 to 500 mM (0-100%) imidazole. Protein purity was assessed on a  
18 nonreducing SDS-PAGE gel, and the pure fractions were collected, dialyzed (~20 mL  
19 sample/2 L dialysis buffer) overnight at 4°C against 20 mM HEPES pH 7.5 and 250 mM  
20 NaCl, and stored at -80°C in 20% glycerol.

21

### 22 **Expression and purification of *E. coli* NemR<sup>C106</sup>**

23 The pET-21b(+)-NemR<sup>C106</sup> plasmid<sup>2</sup>, which contains only one cysteine (Cys106),  
24 was transformed in *E. coli* BL21 (DE3) cells. Cells were grown in Lysogeny Broth (LB)  
25 supplemented with 50 µg/mL of kanamycin at 37°C until the A<sub>600</sub> reached 0.8. Isopropyl  
26 β-d-1-thiogalactopyranoside (IPTG) (0.5 mM) was used for the expression induction,  
27 followed by 3 h of incubation at 37°C. Harvested cells were then pelleted at 4°C, 5000 rpm  
28 for 15 min using the Avanti<sup>®</sup> J-26xp centrifuge (Beckman Coulter<sup>®</sup>) and resuspended in  
29 lysis buffer composed of 50 mM Tris/HCl pH 8, 0.2 M NaCl, 1 mM DTT, 0.1 mg/ml 4-(2-  
30 aminoethyl) benzenesulfonyl fluoride hydrochloride (AEBSF), 1 µg/ml Leupeptin, 50

1  $\mu\text{g/ml}$  Dnase I, and 20 mM  $\text{MgCl}_2$ . Cells were disrupted and centrifuged as mentioned  
2 above. The supernatant was in-batch incubated with  $\text{Ni}^{2+}$ -Sepharose 6 Fast Flow beads  
3 (Cytiva) equilibrated with 50 mM Tris/HCl pH 8, 0.2 M NaCl and 1 mM DTT for 1 h at  
4  $4^\circ\text{C}$ . The beads were packed in a column, and the AKTA™ Pure system (GE Healthcare,  
5 Life Sciences) was used for purification. NemR<sup>C106</sup> was eluted using a linear gradient with  
6 elution buffer consisting of 50 mM Tris/HCl pH 8, 0.2 M NaCl, 1 mM DTT and 0 to 700  
7 mM (0-100%) imidazole. Following purification, protein purity was assessed on a  
8 nonreducing SDS-PAGE gel, and the pure fractions were dialyzed (~20 mL sample/2 L  
9 dialysis buffer) overnight at  $4^\circ\text{C}$  against the binding buffer and stored at  $-20^\circ\text{C}$ .

10

### 11 **Molecular cloning procedures**

12 Tersus Plus PCR Kit (Evrogen) was used for all amplification procedures. Primers  
13 are listed in **Supplementary Table 3**. An overlap extension PCR protocol was  
14 implemented to engineer NemR-cpYFP versions. Each reaction mix included NemR<sup>C106</sup>  
15 N- and C-terminal fragments and cpYFP fragment in equal molar amounts. The DNA  
16 concentration was estimated with horizontal DNA electrophoresis in an agarose gel. The  
17 pQE30-HyPer-2 plasmid<sup>3</sup> was used as a template to amplify the cpYFP part. Two versions  
18 of this fragment (with SAG/G and SAG/GT linker pairs) were generated with the use of  
19 N<sub>01</sub>/N<sub>18</sub> and N<sub>02</sub>/N<sub>19</sub> primer pairs, respectively. The pET-21b(+)-NemR<sup>C106</sup> plasmid was  
20 used as a template to amplify NemR<sup>C106</sup> N- and C-terminal parts. All NemR<sup>C106</sup> N-terminal  
21 parts were generated with the use of primer N<sub>03</sub> and one of the primers from the N<sub>21</sub>-32  
22 subset. All NemR<sup>C106</sup> C-terminal parts were generated with the use of primer N<sub>20</sub> and one  
23 of the primers from the N<sub>04</sub>-15 subset. Upon completion of the overlap extension PCR  
24 protocol, the target product was separated from the nontarget byproducts with horizontal  
25 DNA electrophoresis in agarose gel and purified with Cleanup Standard Kit (Evrogen). To  
26 engineer pQE30-NemR-cpYFP plasmids, the purified NemR-cpYFP constructs and intact  
27 pQE30 vector were incubated with BamHI and HindIII FastDigest™ enzymes in the  
28 corresponding buffer (Thermo Scientific) at  $37^\circ\text{C}$  for 20 minutes. The restricted  
29 polynucleotides were purified with Cleanup Standard Kit (Evrogen) and ligated with T4  
30 DNA ligase in the corresponding buffer (Evrogen) at  $14^\circ\text{C}$  overnight. The molar

1 vector/insert ratio was approximately 1:3 in all cases. The DNA concentration was  
2 estimated with horizontal DNA electrophoresis in an agarose gel. After incubation, the  
3 samples were transformed into *E. coli* XL1Blue cells, which were grown on LB-agar plates  
4 containing 100 µg/ml ampicillin for 14 h at 37°C. To detect colonies bearing the target  
5 plasmid, ScreenMix Kit (Evrogen) was used according to the manufacturer's protocol. The  
6 positive colonies were then transferred to 100 µg/ml ampicillin LB and grown for 14 h at  
7 37°C, 200 rpm (New Brunswick™ Excella® E25). The resulting NemR-cpYFP-bearing  
8 vectors were purified with the use of Plasmid Miniprep Kit (Evrogen) according to the  
9 manufacturer's protocol. The DNA concentration in the pure samples was measured with  
10 the use of a NanoDrop 2000 spectrophotometer (Thermo Scientific). The lack of any  
11 undesired mutations in the engineered genes was established by DNA sequencing  
12 (Evrogen).

13 An overlap extension PCR protocol was implemented to engineer inactivated  
14 HypocratesCS version (the first-generation control). The reaction mix included Hypocrates  
15 N- and C-terminal fragments with the desired substitution in equal molar amounts. The  
16 DNA concentration was estimated with horizontal DNA electrophoresis in an agarose gel.  
17 The pQE30-Hypocrates plasmid was used as a template to amplify both parts. The N- and  
18 C-terminal parts were generated with the use of N<sub>3</sub>/N<sub>33</sub> and N<sub>16</sub>/N<sub>20</sub> primer pairs,  
19 respectively. The reaction mix after overlap extension PCR was subjected to the same  
20 procedures as described above.

21 To transfer any NemR-cpYFP version from the pQE30 vector to the PCS2+ vector,  
22 the corresponding gene was amplified with the use of the N<sub>17</sub>/N<sub>34</sub> primer pair and  
23 purified with Cleanup Standard Kit (Evrogen). The obtained construct and intact PCS2+  
24 vector were incubated with ClaI and XbaI FastDigest™ enzymes in the corresponding  
25 buffer (Thermo Scientific) at 37°C for 20 minutes. The restricted polynucleotides were  
26 then subjected to the same procedures as described above.

27

### 28 **Functionality tests of NemR-cpYFP variants in *E. coli* cells**

29 To obtain bacterial cells that express any of the NemR-cpYFP variants, the pQE30  
30 vector bearing the desired gene was transformed to *E. coli* XL1Blue cells, after which they



1 were grown on LB-agar plates containing 100  $\mu\text{g/ml}$  ampicillin for 14 h at 37°C. In all  
2 cases, the bacterial density was controlled to achieve conditions in which the individual  
3 colonies were located at a distance of 1-2 mm from each other, as this parameter  
4 significantly affects the maturation and the redox state of the sensors. The fluorescence  
5 intensity of the cells was estimated with the use of an Olympus US SZX12 fluorescent  
6 binocular microscope. On the first day, all NemR-cpYFP versions were characterized by  
7 weak fluorescence, which was attributed to the fact that circularly permuted fluorescent  
8 proteins have destabilized structure and require more time for efficient maturation. Given  
9 that, the LB-agar plates were additionally incubated for 24 h at 17-20°C, as it is known that  
10 the maturation of circularly permuted fluorescent proteins proceeds better at lower  
11 temperatures.

12 To test the functionality of NemR-cpYFP variants, the bacterial biomass was  
13 transferred to 1 ml of PBS (137 mM NaCl, 2.7 mM KCl, 10 mM Na<sub>2</sub>HPO<sub>4</sub>, 1.8 mM  
14 KH<sub>2</sub>PO<sub>4</sub>, pH = 7.4) and resuspended with an automatic pipette. The fluorescence spectra  
15 ( $\lambda_{\text{ex}} = 425 \text{ nm}$  or 500 nm) and the excitation spectra ( $\lambda_{\text{em}} = 525 \text{ nm}$ ) were recorded with the  
16 use of a Varian Cary Eclipse Fluorescence Spectrophotometer. The suspensions were  
17 treated with NaOCl aliquots to achieve the final oxidant concentration of 80  $\mu\text{M}$ , after  
18 which the spectral measurements were repeated. In all cases, the samples were mixed by  
19 pipetting prior to the final spectra registration until the signal stabilization was observed.  
20 The data were analyzed with OriginPro 9.0 (OriginLab).

21

## 22 **Expression and purification of NemR-cpYFP variants, EYFP, intact cpYFP,** 23 **HyPer-2 and SypHer3s**

24 In the current work, two different protocols for Hypocrates expression and  
25 purification were used. Both of them led to obtaining the functional biosensor. Therefore,  
26 they should be considered to be equal.

27 *Protocol 1.* Xl1Blue cells were transformed with pQE30-Hypocrates plasmid, after  
28 which they were plated (LB-agar medium, 100  $\mu\text{g/ml}$  ampicillin) and incubated for 14 h at  
29 37°C. The bacterial density was controlled as described above. To achieve better protein  
30 folding and maturation, the plates were additionally incubated for 24 h at 17-20°C. Next,

1 the cells were washed from the agar surface by ice-cold PBS, and the final volume of the  
2 suspension was adjusted to 24 ml with the same buffer. The number of plates used for a  
3 single purification procedure was twenty. The cells were destructed with the use of a Sonic  
4 VibraCell instrument in an ice bath (5 s sonication + 10 s pause cycle; total sonication time  
5 – 9 min; the amplitude – 32%). The obtained lysates were centrifuged for 20 min at 21,000  
6 g and 4°C (Centrifuge 5424 R, Eppendorf) to precipitate insoluble fractions. The  
7 supernatants were collected and applied to a column filled with 5 ml of TALON Metal  
8 Affinity resin (Takara) previously equilibrated with ice-cold PBS. The column was washed  
9 with 50 ml of the same buffer to get rid of nontarget proteins. The elution step was  
10 performed by the addition of 10 ml of ice-cold PBS containing 250 mM imidazole, and the  
11 fraction with the target protein was collected on the basis of its bright yellow color. The  
12 elimination of imidazole was achieved by gel filtration on columns filled with 10 ml of  
13 Sephadex G-25 (GE Healthcare Life Sciences) previously equilibrated with ice-cold PBS.  
14 The pure protein sample was stored at 4°C for no more than 3 days. The addition of any  
15 reducing agents (such as  $\beta$ -mercaptoethanol) did not alter the properties of the protein –  
16 the sensor was obtained in its fully reduced form, even in their absence. Hypocrates  
17 samples, purified according to this protocol, were implemented for the following tests: the  
18 measurements of optical parameters, fluorescence spectra stability and reversibility  
19 experiments, fluorescence selectivity experiments, and measurements of MPO activity.  
20 Other primary NemR-cpYFP versions, EYFP, cpYFP, and SypHer3s were purified  
21 according to the same protocol as well as HyPer-2. However, in the case of the latter, all  
22 buffers, except for those used at the gel filtration step, contained 5 mM  $\beta$ -mercaptoethanol  
23 to avoid the oxidation of the sensor. The protein concentration in the final samples was  
24 measured with the use of Bicinchoninic Acid Kit for Protein Determination (Sigma-  
25 Aldrich) and a 96-well plate analyzer (Tecan Infinite 200 PRO).

26 *Protocol 2.* Shuffle<sup>®</sup> T7 or XL1Blue cells were transformed with pQE30-  
27 Hypocrates plasmid, respectively. The cells were plated on LB-agar-ampicillin and  
28 incubated overnight at 37°C (for XL1Blue) and 30°C (for Shuffle<sup>®</sup> T7). Plates were  
29 transferred to a 25°C incubator until they expressed the protein, as indicated by yellow  
30 colored colonies. At the next step, several colonies were transferred to 3 L of LB medium

1 supplemented with 100 µg/mL ampicillin and incubated for 36 h at 25°C by rotating at 180  
2 rpm. Cells were harvested, and the pellet was resuspended in lysis buffer composed of 40  
3 mM Tris pH 7.5, 150 mM KCl, 10 mM MgSO<sub>4</sub>, 5 mM DTT, 0.1 mg/ml AEBSF, 1 µg/ml  
4 Leupeptin, 50 µg/ml DnaseI, and 20 mM MgCl<sub>2</sub>. Cells were lysed and centrifuged as  
5 performed for NemR<sup>C106</sup>, and the supernatant was in-batch incubated with Ni<sup>2+</sup>-Sepharose  
6 beads (Thermo Scientific) equilibrated with binding buffer: 40 mM Tris pH 7.5, 150 mM  
7 KCl, 10 mM MgSO<sub>4</sub> and 1 mM DTT for 1 h at 4°C. After column packing, the AKTA™  
8 Pure system (GE Healthcare, Life Sciences) was used to elute the protein using a binding  
9 buffer with 400 mM imidazole followed by size exclusion chromatography on a  
10 Superdex75 16/600 (GE Healthcare) column equilibrated in binding buffer. The purity of  
11 the protein was assessed on a nonreducing SDS-PAGE gel, and the pure fractions were  
12 collected and stored at -20°C. Hypocrates sample, purified according to this protocol, was  
13 implemented for the following tests: circular dichroism experiments, pKa determination,  
14 fluorescence selectivity experiments, fluorescence sensitivity experiments, presteady state  
15 kinetic measurements, HypocratesCS crystallization.

16

### 17 **N-chlorotaurine and NaONOO preparation**

18 The preparation of N-chlorotaurine was carried out according to Patent  
19 DE4041703A (<https://patents.google.com/patent/DE4041703A1/en>). Chloramine T  
20 trihydrate (6.0 g, 21.3 mmol) was dissolved in dry methanol (50 mL). Finely powdered  
21 taurine (2.5 g, 20 mmol) was added, and the mixture was stirred for 20 h at room  
22 temperature (20-25°C). The solvent was removed on a rotary evaporator, and the residue  
23 was washed with isopropyl alcohol (3 times, 10 ml) and diethyl ether (3 times, 35 ml). The  
24 white solid was dried in vacuum (5 mmHg, 1 h). The NMR analysis of the product (DMSO-  
25 d6) showed the absence of aromatic protons. The product was stored at -20°C.

26 The preparation of NaONOO solution was carried out according to Uppu<sup>4</sup>. NaOH  
27 (4.0 g, 0.10 mol) was dissolved in water (35 mL). The mixture was cooled in an ice bath  
28 to 5-0°C, and a solution of 35% H<sub>2</sub>O<sub>2</sub> (11 ml, approximately 0.11 mol) and EDTA (solid,  
29 75 mg) were added. Liquid isoamyl nitrite (13.5 ml, 0.10 mol) was added, and the mixture  
30 was vigorously stirred at room temperature (~25°C) for 5 h. The mixture was diluted with

1 dichloromethane (100 ml), and the water phase was separated and washed additionally with  
2 dichloromethane (5 times, 100 ml each). The unreacted H<sub>2</sub>O<sub>2</sub> was then removed by passing  
3 the aqueous phase through manganese dioxide (10-15 g, 5 mm layer). The resulting  
4 solution was additionally filtered from traces of MnO<sub>2</sub>, and the traces of dichloromethane  
5 were removed in vacuum (5 mmHg, 1 h). The resulting NaONOO solution was used in the  
6 further experiments. The solution was stored at -20°C. The concentration of ONOO<sup>-</sup> ions  
7 was determined before each usage using spectrophotometry (Varian Cary 5000  
8 Spectrophotometer). For these measurements, the solution was diluted with NaOH solution  
9 (pure water, 0.1 M concentration). Concentration was determined using Lambert-Beer's  
10 law:  $\epsilon$  at 302 nm = 1670 M<sup>-1</sup>cm<sup>-1</sup> for ONOO<sup>-</sup> ions.

11

### 12 **Measurements of the optical parameters of NemR-cpYFP variants**

13 To measure the brightness of the primary NemR-cpYFP versions, the proteins were  
14 diluted in PBS to equimolar concentrations (according to Bicinchoninic Acid Kit). Purified  
15 EYFP served as the comparison control. The absorbance and fluorescence excitation  
16 spectra ( $\lambda_{em}$  = 513 nm and 533 nm for NemR-cpYFP variants and EYFP, respectively) of  
17 the samples were recorded with the use of a Varian Cary 5000 Spectrophotometer or a  
18 Varian Cary Eclipse Fluorescence Spectrophotometer. The molar extinction coefficients  
19 ( $\epsilon$ ) were calculated according to the following equation –  $\epsilon = A/(C \cdot L)$ , where A was the  
20 optical density at the studied absorption maximum, C was the protein concentration (M),  
21 and L was the optical path length (cm). The fluorescence quantum yields (QY) were  
22 calculated according to the following equation –  $QY_{NemR-cpYFP} = QY_{EYFP} \cdot (A_{EYFP} \cdot Em_{NemR-}$   
23  $cpYFP) / (A_{NemR-cpYFP} \cdot Em_{EYFP})$ , where A was the optical density at the studied absorption  
24 maximum, and Em was the emission intensity at the studied excitation maximum ( $\lambda_{ex}$  =  
25 425 nm or 500 nm for NemR-cpYFP variants, and 519 nm for EYFP).  $QY_{EYFP}$  is a standard  
26 value of 0.67 according to the literature (Fpbase ID: 8DNLG). The data were analyzed with  
27 OriginPro 9.0 (OriginLab).

28 The purified sensor samples might contain not fully folded and matured molecules,  
29 reducing the accuracy of the optical parameters' measurements. Therefore, the molar  
30 extinction coefficients and Qys of Hypocrates were investigated in more detail. To estimate

1 the concentration of fully matured chromophores, the samples of Hypocrates and EYFP  
2 were mixed with 0.1 M NaOH at the volume ratio of 1:1 and incubated for 5 minutes. In  
3 the described conditions, yellow fluorescent proteins undergo denaturation, and mature  
4 chromophores are converted to the form absorbing at 445 nm with  $\epsilon = 44000 \text{ M}^{-1}\text{cm}^{-1}$ . To  
5 investigate how reducing and oxidizing agents alter the optical parameters, some of the  
6 Hypocrates samples were incubated in the presence of 0.5 mM N-chlorotaurine or 5 mM  
7 DTT for 30 minutes prior to spectra registration. All of the following procedures were  
8 carried out as described above. The data were analyzed with OriginPro 9.0 (OriginLab).

9

### 10 **Fluorescence spectra stability and reversibility experiments**

11 To investigate whether high oxidant concentrations damage the proteins, purified  
12 Hypocrates samples (0.5  $\mu\text{M}$ ) were treated with saturating oxidant concentrations (5-10  
13  $\mu\text{M}$ ), and their fluorescence excitation spectra ( $\lambda_{\text{em}} = 520 \text{ nm}$ ) were recorded. Next, the  
14 aliquots of corresponding oxidants were added to achieve extremely high concentrations  
15 (100  $\mu\text{M}$ ), and the same measurements were carried out. In all cases, the samples were  
16 mixed by pipetting prior to the final spectra registration until the signal stabilization was  
17 observed. NaOCl and N-chlorotaurine were tested in PBS, while NaONOO was tested in  
18 sodium phosphate buffer to avoid possible  $\text{OCl}^-$  generation in the system. In the last case,  
19 the protein aliquots were transferred to the corresponding buffer with the use of Amicon  
20 Ultra-0.5 Centrifugal Filter Units (Millipore). The NaOCl sensitivities of intact cpYFP,  
21 SypHer3s and HyPer-2 purified proteins were investigated according to the same protocol.  
22 The measurements were performed with the use of a Varian Cary Eclipse Fluorescence  
23 Spectrophotometer. The data were analyzed with OriginPro 9.0 (OriginLab).

24 To investigate whether Hypocrates oxidation is reversible, purified protein samples  
25 (0.5-2  $\mu\text{M}$ ) were treated with saturating oxidant concentrations (5-50  $\mu\text{M}$ ) and incubated  
26 for 5 min, after which the fluorescence excitation spectra were recorded. Next, DTT was  
27 added to the reaction mix to the final concentration of 1-5 mM, and the probes were  
28 incubated for 40-60 min prior to the spectra registration. In some cases, two additional  
29 control probes (intact and with the same oxidant concentration) were prepared and  
30 incubated for the same time to control for possible artifacts caused by prolonged

1 atmosphere exposure. The measurements were performed with the use of either a Varian  
2 Cary Eclipse Fluorescence Spectrophotometer or an LS55 luminescence  
3 spectrophotometer. The data were analyzed with OriginPro 9.0 (OriginLab).

4

### 5 **Biosensor secondary structural changes with circular dichroism**

6 Changes in the overall secondary structure of the Hypocrates between its reduced  
7 and oxidized (NaOCl or H<sub>2</sub>O<sub>2</sub>) forms were evaluated with circular dichroism (CD)  
8 spectroscopy. The protein was reduced with 30 mM DTT for 30 min at room temperature.  
9 A Hi-Trap® desalting column (GE Healthcare), equilibrated with 20 mM sodium  
10 phosphate buffer pH 7.4, was used to remove excess DTT. To prepare the oxidized  
11 samples, Hypocrates (25 μM) was incubated for 10 min at room temperature with different  
12 concentrations of NaOCl (1:1, 1:5 and 1:10 ratios) or H<sub>2</sub>O<sub>2</sub> (1:1, 1:3 and 1:6 ratios of  
13 protein to oxidant concentration), with a reaction buffer composed of 20 mM sodium  
14 phosphate, pH 7.4, and 200 mM sodium fluoride. Micro Bio-Spin® Chromatography  
15 Columns (BIO-RAD), equilibrated with the same buffer, were used to remove the oxidants.  
16 Following sample preparation, a Jasco J-810 spectropolarimeter was used to analyze 4 μM  
17 of each sample at 25°C in a quartz cuvette with a 1-mm path length. Far-UV CD spectra  
18 (190-260 nm) were measured, and the data were analyzed with GraphPad Prism8 and  
19 OriginPro 9.0 (OriginLab).

20 To determine whether the overall secondary structure could be restored, DTT was  
21 used. NaOCl-oxidized Hypocrates (1:10 protein/oxidant ratio) was incubated with 200 μM  
22 DTT for 5 min at room temperature. The background from the buffer and the addition of  
23 200 μM DTT was subtracted.

24

### 25 **pKa determination of reduced and oxidized NemR-cpYFP versions**

26 To determine the pKa of Hypocrates, the protein was reduced with DTT and buffer-  
27 exchanged into 100 mM sodium phosphate buffer using a Hi-Trap® desalting column (GE  
28 Healthcare). Reduced Hypocrates (0.5 μM) in the presence or absence of 12.5 μM oxidants  
29 (NaOCl and NCT) was diluted in a polybuffer solution with several pH values (0.5 pH unit  
30 intervals), and the excitation spectra (with λ<sub>em</sub> = 555 nm) were recorded after 5 min of



1 incubation at 25°C using a SpectraMax iD5 plate reader (Molecular Devices). The  
2 polybuffer solution consisted of sodium acetate (10 mM), sodium phosphate (10 mM),  
3 sodium borate (10 mM) and sodium citrate (10 mM). The  $EX_{500}/EX_{417}$  ratio was plotted as  
4 a function of increasing buffer pH. For each measurement, at least three independent  
5 replicates were performed, and the data were analyzed using GraphPad Prism8 and  
6 OriginPro 9.0 (OriginLab). The pKa of reduced HypocratesCS was determined as  
7 described for reduced Hypocrates.

8

### 9 **Fluorescence selectivity experiments**

10 Aliquots of the sensor (2  $\mu$ M) were incubated with different oxidants: NaOCl (50  
11  $\mu$ M), N-chlorotaurine (50  $\mu$ M), H<sub>2</sub>O<sub>2</sub> (50  $\mu$ M), glutathione (GSH; 500  $\mu$ M), glutathione  
12 disulfide (GSSG; 500  $\mu$ M), MAHMA NONOate (NO<sup>•</sup> generator; 50  $\mu$ M), Na<sub>2</sub>S (50  $\mu$ M),  
13 NaONOO (50  $\mu$ M), and X/XOX system (O<sub>2</sub><sup>-</sup> generator; 50  $\mu$ M + 0.05 U/ml). Both  
14 NaONOO and X/XOX samples contained catalase (0.1  $\mu$ M) as an additional control, which  
15 removed H<sub>2</sub>O<sub>2</sub> generated during the reaction. The samples were incubated for 5 min at  
16 25°C, and the ratiometric fluorescence changes were monitored by an excitation scan ( $\lambda_{em}$   
17 = 515 nm) using an LS55 luminescence spectrophotometer (PerkinElmer). For each  
18 concentration, at least three independent experimental measurements were performed. The  
19 changes in intrinsic Trp fluorescence were measured using an emission scan ( $\lambda_{ex}$  = 295  
20 nm). The data were analyzed with OriginPro 9.0 (OriginLab).

21

### 22 **Fluorescence sensitivity experiments**

23 Hypocrates sensitivity experiments were performed in 100 mM sodium phosphate  
24 buffer. Aliquots of the purified protein (0.5  $\mu$ M) were incubated with increasing  
25 concentrations of NaOCl and NCT for 5 min at 25°C. The excitation scans (with  $\lambda_{em}$  = 555  
26 nm) were recorded with the use of a SpectraMax iD5 plate reader (Molecular Devices).  
27 The  $EX_{500}/EX_{417}$  ratio, which represents the ratio between fluorescence excited at 500 nm  
28 and at 417 nm, was plotted as a function of increasing oxidant concentration. The initial  
29 linear part of the hyperbolic curve was analyzed using linear regression, where the slope  
30 values represent the sensitivity towards the corresponding oxidants. For each measurement,

1 at least two independent replicates were performed, and the data were analyzed using  
2 GraphPad Prism8 and OriginPro 9.0 (OriginLab).

3

#### 4 **Presteady-state kinetic measurements**

5 Presteady-state kinetic measurements were performed using a stopped-flow  
6 apparatus coupled to a fluorescence detector (Applied Photophysics SV20). For HypR,  
7 changes in intrinsic Tyr fluorescence were measured using a >305 nm cut-off filter ( $\lambda_{\text{ex}} =$   
8 274 nm). For NemR<sup>C106</sup>, changes in intrinsic Trp fluorescence were measured using a >320  
9 nm cut-off filter ( $\lambda_{\text{ex}} = 295$  nm). For Hypocrates, changes in the cpYFP chromophore  
10 fluorescence were measured using a >515 nm cut-off filter ( $\lambda_{\text{ex}} = 485$  nm). The excitation  
11 and emission wavelengths for each protein were determined prior to the stopped-flow  
12 experiments using an LS55 luminescence spectrophotometer (PerkinElmer). The oxidant  
13 concentration range required to lead to fluorescence changes for each protein was also  
14 determined.

15 Prior to the experiment, the samples were reduced with 30 mM DTT for 30 min at  
16 room temperature. A Hi-Trap® desalting column (GE Healthcare), equilibrated with  
17 argon-flushed 100 mM sodium phosphate pH 7.4 buffer, was used to remove excess DTT.  
18 To determine the second-order rate constants, 0.5  $\mu\text{M}$  Hypocrates or 1  $\mu\text{M}$  NemR or HypR  
19 was mixed with increasing concentrations of an oxidant (NaOCl or N-chlorotaurine) in a  
20 reaction medium of 100 mM sodium phosphate buffer at 25°C. Changes in fluorescence  
21 were monitored, and the obtained curves were fitted with a single exponential equation ( $Y$   
22  $= A \cdot e^{(-k_{\text{obs}} \cdot t)} + \text{offset}$ ). For each oxidant concentration, the observed rate constant ( $k_{\text{obs}}$ ) was  
23 determined. The  $k_{\text{obs}}$  values were plotted against the different oxidant concentrations, and  
24 linear regression was used to obtain the second-order rate constants from the slope  
25 (GraphPad Prism8 and OriginPro 9.0). For each concentration, at least two independent  
26 experimental measurements were performed.

27

#### 28 **HypocratesCS crystallization, X-ray data collection, and structure** 29 **determination**

1 HypocratesCS was crystallized at 7 mg/mL concentration at 10°C or 20°C using the  
2 hanging-drop vapor diffusion method with Tris (0.1 M, pH 8), CaCl<sub>2</sub> (0.1 M), MgCl<sub>2</sub> (0.1  
3 M) and PE15/4 (15%) as a precipitant solution. The drops were composed of 1 μL of  
4 protein and 1 μL of precipitant solution. To obtain larger and better diffracting crystals, the  
5 small needles obtained within the above crystallization condition were used for  
6 microseeding.

7 For X-ray data collection, the cryo-protectant used was the same as the precipitant  
8 solution, but with 30% PE15/4. X-ray data were collected at 100 K at the Proxima 2  
9 beamline of the Soleil synchrotron facility, at a wavelength of 0.980113 Å, and processed  
10 using XDS<sup>6</sup>. The STARANISO server was used to perform anisotropic correction of the  
11 data<sup>7</sup>. The structure of HypocratesCS was solved by molecular replacement using Phase<sup>8</sup>  
12 from the Phenix suite<sup>9</sup>, using both the *E. coli* NemR (PDB: 4YZE) (100% identical to the  
13 sensory domain of HypocratesCS) and the cpYFP-based calcium biosensor (PDB: 3O77)  
14 (98% identity to the cpYFP) as search models. Coot<sup>10</sup> was used to manually complete the  
15 building of the structure, and the refinement was done using Phenix. Refine<sup>11</sup> from the  
16 Phenix suite. Analysis of the Ramachandran plot showed that 96.59% of the residues are  
17 in the most favored areas of the Ramachandran plot, 2.93% in additionally allowed areas,  
18 and 0.49% in disallowed areas. The data collection statistics and refinement parameters are  
19 summarized in **Supplementary Table 2**.

20

### 21 **Measurements of MPO activity with purified Hypocrates**

22 To test whether Hypocrates is capable of visualizing MPO activity *in vitro*, the  
23 purified sensor was incubated with 0.1 U/ml human MPO and 100 μM H<sub>2</sub>O<sub>2</sub> for 10 min in  
24 PBS, after which the fluorescence excitation spectrum ( $\lambda_{em} = 525$  nm) was recorded with  
25 the use of a Varian Cary Eclipse Fluorescence Spectrophotometer. The probes that  
26 contained only one component of the MPO-H<sub>2</sub>O<sub>2</sub> system were treated according to the  
27 same protocol to control for nonspecific fluorescence changes. The data were analyzed  
28 using OriginPro 9.0 (OriginLab).

29 To record the dynamics of HOCl production by MPO *in vitro*, purified Hypocrates  
30 was incubated in the presence of 0.1 U/ml human MPO, and the intensities of fluorescence

1 ( $\lambda_{em} = 525$  nm) excited at 425 nm and 500 nm were collected each 2.4 s with the use of a  
2 Varian Cary Eclipse Fluorescence Spectrophotometer. To start the MPO reaction, 100  $\mu$ M  
3 H<sub>2</sub>O<sub>2</sub> was added to the reaction mix. A probe without MPO was treated according to the  
4 same protocol to control for H<sub>2</sub>O<sub>2</sub>-induced fluorescence changes. A probe without MPO  
5 and without H<sub>2</sub>O<sub>2</sub> addition was treated according to the same protocol to control for  
6 fluorescence changes attributed to prolonged incubation. For all three samples, the  
7 EX<sub>500</sub>/EX<sub>425</sub> ratio was calculated as a function of time, and the first two curves were  
8 normalized by the third one. The data were analyzed using OriginPro 9.0 (OriginLab).

9

## 10 **NaOCl visualization with Hypocrates, HypocratesCS and SypHer3s in HeLa** 11 **Kyoto cells**

12 HeLa Kyoto cells were cultured in DMEM (PanEko) supplemented with 10% FBS  
13 (Biosera), 2 mM L-glutamine (PanEko), 50 units/ml penicillin (PanEko) and 50  $\mu$ g/ml  
14 streptomycin (PanEko) at 37 °C in atmosphere containing 5% CO<sub>2</sub>. Cells were passaged  
15 every 2-3 days. For transfection, cells were seeded into 35-mm glass-bottom dishes (SPL  
16 Lifesciences). After 24 h, cells were transfected with the plasmid of the required sensor  
17 using FuGene HD transfection reagent (Promega) according to the manufacturer's  
18 protocol. Fluorescent microscopy was performed on the next day after transfection with a  
19 Leica DMI 6000 microscope, equipped with an HCX PL Apo CS 40.0  $\times$  1.25 Oil UV  
20 objective, CFP (excitation filter BP 436/20, dichromatic mirror 455, suppression filter BP  
21 480/40) and GFP (excitation filter BP 470/40, dichromatic mirror 500, suppression filter  
22 BP 525/50) filter cubes. A 10 mM stock solution of NaOCl (EMPLURA) in Milli-Q water  
23 was freshly prepared before cell imaging. Cell culture medium was replaced with 900  $\mu$ L  
24 of PBS, and baseline fluorescence was detected for several minutes. PBS was chosen as an  
25 inorganic imaging medium because NaOCl, being a strong oxidant, can react with the  
26 nitrogen-containing components of the medium and thus introduce inaccuracy to the  
27 results. The desired amount of NaOCl stock was diluted in 100  $\mu$ L of PBS just before  
28 addition, and the final concentration of NaOCl in the sample was in the range of 10-40  $\mu$ M.  
29 All measurements were taken at room temperature because the maximum response  
30 amplitude of Hypocrates is being reduced as a result of heating. The responses of sensors

1 were calculated as ratios of fluorescence intensities excited at 500 nm and at 425 nm  
2 (Ex<sub>500</sub>/Ex<sub>425</sub> ratio) and normalized to the signal of the probe on the first image of the series.  
3 Processing of the images and quantification of results were performed using Fiji  
4 (<https://fiji.sc>), Excel (Microsoft) and OriginPro 9.0 (OriginLab).

5

### 6 ***Danio rerio* tail fin inflammation model**

7 For the tail fin amputation experiment, mRNAs of Hypocrates, HypocratesCS and  
8 HyPerRed were *in vitro* synthesized using mMessage mMachine Transcription Kit  
9 (Invitrogen) according to manufacturer's manual. For transient expression of the  
10 biosensors in zebrafish larvae, 80 ng/μL of Hypocrates or HypocratesCS mRNA and 50  
11 ng/μL of HyPerRed mRNA were co-injected into 1-cell-stage embryos. The zebrafish  
12 embryos were maintained in egg water containing 0.2 mM N-phenylthiourea (PTU; Sigma)  
13 to prevent pigment formation at 28 °C. Fluorescence imaging was performed 48 h  
14 postfertilization (hpf). Larvae were anesthetized in 0.02% MS-222, tricaine (Sigma),  
15 embedded in low-melting agarose (0.8%) and then subjected to tail fin amputation under a  
16 stereoscopic microscope. Imaging was performed with a CSU-W1 Yokogawa spinning  
17 disk coupled to a Zeiss Axio Observer Z1 inverted microscope equipped with a sCMOS  
18 Hamamatsu camera and a 25x (Zeiss 0.8 Imm WD: 0.19 mm) oil objective. DPSS 100 mW  
19 405 nm and 150 mW 491 nm lasers and a 525/50 bandpass excitation filter were used for  
20 Hypocrates and HypocratesCS imaging. A 100 mW 561 nm laser and a 595/50 bandpass  
21 filter were used for HyPerRed imaging. To quantify the response, fluorescent signal at the  
22 amputation plane was normalized to the mean fluorescence of the tail before amputation.  
23 A statistical two-way ANOVA test with a Tukey's multiple comparisons posttest was then  
24 performed.

25

### 26 **References**

27 1. V. V. Loi, *et al.*, Redox-Sensing Under Hypochlorite Stress and Infection  
28 Conditions by the Rrf2-Family Repressor HypR in *Staphylococcus aureus*.  
29 *Antioxid. Redox Signal.* **29**, 615–636 (2018).

- 1        2. M. J. Gray, W.-Y. Wholey, B. W. Parker, M. Kim, U. Jakob, NemR is a bleach-  
2            sensing transcription factor. *J. Biol. Chem.* **288**, 13789–13798 (2013).
- 3        3. K. N. Markvicheva, *et al.*, A genetically encoded sensor for H<sub>2</sub>O<sub>2</sub> with expanded  
4            dynamic range. *Bioorg. Med. Chem.* **19**, 1079–1084 (2011).
- 5        4. R. M Uppu. Synthesis of peroxyxynitrite using isoamyl nitrite and hydrogen peroxide  
6            in a homogeneous solvent system. *Anal. Biochem.* **354**, 165–168 (2006).
- 7        5. W. W Ward. Biochemical and physical properties of green fluorescent protein.  
8            *Methods Biochem. Anal.* **47**, 39–65 (2006).
- 9        6. W Kabsch. it XDS. *Acta Crystallogr. Sect. D* **66**, 125–132 (2010).
- 10       7. I.J. Tickle, C. Flensburg, P. Keller, W. Paciorek, A. Sharff, C. Vonrhein, G.  
11           Bricogne. STARANISO. *Cambridge, United Kingdom: Global Phasing Ltd.*  
12           (2018).
- 13       8. A.J. McCoy et al. Phaser crystallographic software. *J Appl Crystallogr* **40**, 658-674  
14           (2007).
- 15       9. P.D. Adams et al. PHENIX: a comprehensive Python-based system for  
16           macromolecular structure solution. *Acta Crystallogr D Biol Crystallogr* **66**, 213-21  
17           (2010).
- 18       10. P. Emsley & K. Cowtan. Coot: model-building tools for molecular graphics. *Acta*  
19           *Crystallogr D Biol Crystallogr* **60**, 2126-32 (2004).
- 20       11. P.V. Afonine et al. Towards automated crystallographic structure refinement with  
21           phenix.refine. *Acta Crystallogr D Biol Crystallogr* **68**, 352-67 (2012).
